# Supplementary material for: Randomised multicentre effectiveness trial of rapid syndromic testing by panel assay in children presenting to European emergency departments with acute respiratory infections—trial protocol for the ADEQUATE Paediatric trial
Source: PubMed Central journal article supplement — BMJ Open. 2024 Apr 25;14(4):e076338. doi: 10.1136/bmjopen-2023-076338 (PMC11057286; doi:10.1136/bmjopen-2023-076338), 2024-04-25
Supplement: bmjopen-2023-076338.draft_revisions.pdf [file bmjopen-2023-076338.draft_revisions.pdf]

# BMJ Open

BMJ Open is committed to open peer review. As part of this commitment we make the peer review history of every article we publish publicly available.

When an article is published we post the peer reviewers' comments and the authors' responses online. We also post the versions of the paper that were used during peer review. These are the versions that the peer review comments apply to.

The versions of the paper that follow are the versions that were submitted during the peer review process. They are not the versions of record or the final published versions. They should not be cited or distributed as the published version of this manuscript.

BMJ Open is an open access journal and the full, final, typeset and author-corrected version of record of the manuscript is available on our site with no access controls, subscription charges or pay-per-view fees (<http://bmjopen.bmj.com>).

If you have any questions on BMJ Open's open peer review process please email [info.bmjopen@bmj.com](mailto:info.bmjopen@bmj.com)

# BMJ Open

**Randomised multi-centre effectiveness trial of rapid syndromic testing by panel assay in children presenting to European emergency departments with acute respiratory infections – trial protocol for the ADEQUATE Paediatric trial**

|                               |                                                                                                                                                                                                                                            |
|-------------------------------|--------------------------------------------------------------------------------------------------------------------------------------------------------------------------------------------------------------------------------------------|
| Journal:                      | <i>BMJ Open</i>                                                                                                                                                                                                                            |
| Manuscript ID                 | bmjopen-2023-076338                                                                                                                                                                                                                        |
| Article Type:                 | Protocol                                                                                                                                                                                                                                   |
| Date Submitted by the Author: | 04-Jun-2023                                                                                                                                                                                                                                |
| Complete List of Authors:     | ADEQUATE Paediatric Trial Group, ADEQUATE Paediatric Trial Group; Fondazione Penta ONLUS Kohns Vasconcelos, Malte; St George's University of London, Antimicrobial Resistance Research Group, Centre for Neonatal and Paediatric Infection |
| Keywords:                     | Respiratory infections < THORACIC MEDICINE, ACCIDENT & EMERGENCY MEDICINE, Paediatric A&E and ambulatory care < PAEDIATRICS, INFECTIOUS DISEASES                                                                                           |
|                               |                                                                                                                                                                                                                                            |

SCHOLARONE™  
Manuscripts

1 **Randomised multi-centre effectiveness trial of rapid syndromic testing by panel assay in children**  
2 **presenting to European emergency departments with acute respiratory infections – trial protocol for the**  
3 **ADEQUATE Paediatric trial**

4  
5 ADEQUATE Paediatric Trial Group  
6  
7  
8  
9

10 Keywords:

11  
12 pragmatic trial, acute respiratory infection, syndromic testing, multiplex PCR, point-of-care testing  
13  
14  
15  
16  
17  
18  
19  
20  
21  
22  
23  
24  
25  
26  
27  
28  
29  
30  
31  
32  
33  
34  
35  
36  
37  
38  
39  
40  
41  
42  
43  
44  
45

46 Correspondence:

47  
48 Malte Kohns Vasconcelos  
49

50 Antimicrobial Resistance Research Group, Centre for Neonatal and Paediatric Infection

51 St. George's, University of London

52 Cranmer Terrace

53  
54 London, SE17 ORE

55  
56 United Kingdom

57  
58 Email: mkohns@sgul.ac.uk  
59  
60

**ABSTRACT**

**Introduction:** Syndromic panel assays, i.e. using one test to simultaneously target multiple pathogens with overlapping signs and symptoms., have been integrated into routine paediatric care over the past decade, mainly for more severely ill and hospitalised patients. Their wider availability and short turnaround times open the possibility to apply them to non-hospitalised patients as well. In this context, it is important to trial how clinicians make use of pathogen detection data and if their early availability influences management decisions, particularly antibiotic use and hospitalisation.

**Methods and analysis:** ADEQUATE is an individually-randomised, controlled, open-label effectiveness trial comparing the impact of a respiratory pathogen panel assay used as a rapid syndromic test in addition to the standard of care versus standard of care alone. The trial will 1:1 randomise 520 participants under the age of 18 at 9 paediatric emergency departments in 6 European countries. Inclusion criteria for the trial consist of two sets, with the first describing respiratory tract infections in paediatric patients and the second describing the situation of potential management uncertainty in which test results may immediately affect management decisions. Enrolment started in July 2021 and is expected to be complete in early 2024. To investigate differences between the two arms for each endpoint separately, a two-sample t-test of the log transformed mean time (in hours) on antibiotic treatment or alive out of hospital comparing those on the standard of care arm (control) and the intervention arm will be performed, assuming a pooled variance estimate.

**Ethics and dissemination:** The trial protocol and materials were approved by research ethics committees in all participating countries. The respiratory pathogen panel assay is CE marked and FDA cleared for diagnostic use. Participants and caregivers provide informed consent prior to study procedures commencing. The trial results will be published in peer-reviewed journals and at national and international conferences. Key messages will also be disseminated via press and social media where appropriate.

**Trial registration number:** NCT04781530

1 27 **Strengths and limitations of this study (max 5 bullet points):**

2

3

4 28 - By design of the eligibility criteria, in this trial application of the test is targeted to a patient

5

6 29 population where decisions are pending and test results may impact initial management decisions.

7

8 30 - The trial's setting spans European countries with some difference in available resources and the

9

10 31 results will therefore likely be generalisable to other high-income country settings.

11

12 32 - Employing a pragmatic design, the protocol does not provide guidance on interpretation of test

13

14 33 results and the results may therefore be sensitive to changing perceptions about current incidence

15

16 34 of pathogens.

17

18

19

20

21

22

23

24

25

26

27

28

29

30

31

32

33

34

35

36

37

38

39

40

41

42

43

44

45

46

47

48

49

50

51

52

53

54

55

56

57

58

59

60

For peer review only

## INTRODUCTION

Community-acquired acute respiratory infections (ARI) are the most frequent reason for unscheduled healthcare visits and at the same time, the most frequent cause of inappropriate antibiotic use.[1, 2] While most ARI cause mild symptoms and are self-limiting, lower respiratory tract infections, including pneumonia, globally cause more than half a million deaths in <5 year old children per year.[3] Especially since the wide roll-out of conjugate vaccines, most of these infections in children do not require treatment with antibiotics. Antibiotic consumption is a driver of development of antimicrobial resistance (AMR) and where use of antibiotics in the individual is not warranted, the ecological and economic cost of antimicrobial resistance per antibiotic consumed is considerable.[4-6]

Determining which pathogen is the likely cause of an infectious episode is one common approach for clinicians to decide on the probability of antibiotic treatment being beneficial in a patient. In paediatric routine care, pathogen testing is usually limited to upper respiratory tract (URT) samples.[7] A wide range of common respiratory pathogens that may cause more severe disease are frequently present in the URT of asymptomatic children as well, thereby making it more difficult to determine the causative pathogen of an episode. While for some viral pathogens, especially RSV, influenza virus, parainfluenza virus and human metapneumovirus, there is a high probability that their detection explains the cause of an episode of severe, for others, including *Streptococcus pneumoniae* and human rhinovirus, the association is much weaker.[8] Uncertainty of aetiology may increase the probability of antibiotic prescriptions.[9]

Children hospitalised for ARI stay in hospital for a median of 2 to 3 days and resolution of symptoms takes much longer.[3, 10] Interventions reducing hospital stays have a high potential to reduce psycho-social costs for families and economic costs for the health system.

Syndromic panel assays, i.e. using one test to simultaneously target multiple pathogens with overlapping signs and symptoms, have been integrated into routine paediatric care over the past decade, mainly for more severely ill and hospitalised patients. Their wider availability and short turnaround times open the possibility to apply them to non-hospitalised patients as well. In this context, it is important to trial how clinicians make use of pathogen detection data and if their early availability influences management decisions.

1 62 VALUE-Dx is the first Innovative Medicines Initiative project initiated by six in vitro diagnostic companies  
2  
3 63 who joined forces with 20 non-industry partners to combat AMR and improve patient outcomes. The  
4  
5 64 multidisciplinary consortium involves clinicians, microbiologists, health economists, social scientists, and  
6  
7 65 industry. The trial described here is a part of this VALUE-Dx project. It aims to determine if the integration  
8  
9  
10 66 of a rapid syndromic test at an early point in time in the management workflow in paediatric emergency  
11  
12 67 departments can influence the decisions to treat a patient with antibiotics or to hospitalise them.  
13  
14  
15  
16  
17  
18  
19  
20  
21  
22  
23  
24  
25  
26  
27  
28  
29  
30  
31  
32  
33  
34  
35  
36  
37  
38  
39  
40  
41  
42  
43  
44  
45  
46  
47  
48  
49  
50  
51  
52  
53  
54  
55  
56  
57  
58  
59  
60

For peer review only

## METHODS AND ANALYSIS

ADEQUATE is an individually randomised, controlled, open-label effectiveness trial comparing the impact of a respiratory pathogen panel assay used as a rapid syndromic test in addition to the standard of care versus standard of care alone on antibiotic use and hospitalisations in paediatric patients with ARI presenting to EDs. The trial is part of workpackage 4 of the VALUE-Dx consortium.

### Trial setting

The trial enrolls participants at 9 paediatric EDs in 6 European countries (Germany, Greece, Italy, Spain, Switzerland and the United Kingdom). Enrolment started in July 2021 and is expected to be complete in early 2024.

### Trial population

Inclusion criteria for the trial consist of two sets, with the first describing respiratory tract infections in paediatric patients and the second describing the situation of potential management uncertainty in which test results may immediately affect management decisions. Few exclusion criteria were introduced to increase generalisability of the trial results. The full eligibility criteria are listed in table 1.

| <i>Inclusion criteria (all must be fulfilled)</i>                                                                                                                                                                                                                                                                                                                                                                                                                                                                                                                                                                                                                                                                                                                                   |
|-------------------------------------------------------------------------------------------------------------------------------------------------------------------------------------------------------------------------------------------------------------------------------------------------------------------------------------------------------------------------------------------------------------------------------------------------------------------------------------------------------------------------------------------------------------------------------------------------------------------------------------------------------------------------------------------------------------------------------------------------------------------------------------|
| <p>1. ARI presentation<br/>Children of any age presenting to the ED with an acute illness (present for 14 days or less) with temperature <math>\geq 38.0^{\circ}\text{C}</math> measured at presentation or parental report of fever within the previous 72 hours AND at least two of the below:</p> <ul style="list-style-type: none"> <li>• Cough</li> <li>• Abnormal sounds on chest auscultation (crackles, reduced breath sounds, bronchial breathing, wheezing)</li> <li>• Clinical signs of dyspnea (chest indrawing, nasal flaring, grunting)</li> <li>• Signs of respiratory dysfunction: tachypnoea for age or decreased oxygen saturation (&lt;92% in room air)</li> <li>• Signs of reduced general state: poor feeding, vomiting or lethargy/drowsiness</li> </ul>      |
| <p>2. Management uncertainty<br/>At time of screening</p> <ul style="list-style-type: none"> <li>• Patient has undergone first assessment by managing clinical team (doctor or nurse, incl. triage)</li> <li>• Hospitalisation is not yet determined, i.e., neither by clinical presentation definitely requiring hospitalisation (e.g., per local guideline) nor by fixed decision of managing clinical team; admission to a short-stay unit or surveillance unit is not considered a hospitalisation for this trial</li> <li>• Antibiotic treatment or hospitalisation is being considered</li> <li>• The rapid syndromic diagnostic test result can be awaited up to 4 hours before the decision to discharge the patient or to initiate antibiotic treatment is made</li> </ul> |
| <i>Exclusion criteria (none may be fulfilled)</i>                                                                                                                                                                                                                                                                                                                                                                                                                                                                                                                                                                                                                                                                                                                                   |
| <p>1. Development of ARTI more than 48 hours after hospital admission (hospital acquired);</p>                                                                                                                                                                                                                                                                                                                                                                                                                                                                                                                                                                                                                                                                                      |



2. Patients with a severe underlying medical condition dictating management decisions including hospitalisation and/or antibiotic treatment (e.g., cystic fibrosis, immunosuppression);
3. Hospitalisation for at least 24 hours within the last 14 days (healthcare-associated);
4. Confirmed pregnancy or breastfeeding;
5. Any clinically significant abnormality identified at the time of screening that in the judgment of the Investigator would preclude safe completion of the study or constrain endpoints assessment such as major systemic diseases or patients with short life expectancy;
6. Inability to obtain informed consent;
7. Alternative noninfectious diagnosis that explains clinical symptoms.

82 Table 1: Eligibility criteria

### 83 **Screening, recruitment and consent**

84 During working hours of study staff, patients in the emergency department or short-stay unit are screened  
85 for eligibility by study staff. In most instances, screening takes place as soon as possible after initial triage.  
86 Informed consent is sought from all patients meeting the eligibility criteria at the time of screening. The  
87 health status of patients might rapidly deteriorate between screening and randomisation. Therefore, all  
88 eligibility criteria are be re-evaluated and confirmed prior to the decision to randomise the patient.

89 Screening failures are defined as patients who were found eligible per screening but have either not given  
90 informed consent, or have deteriorated between screening and randomisation, and therefore no longer  
91 fulfil eligibility criteria. Screening failures are recorded anonymously on a screening log detailing the reason  
92 for screening failure and are not randomised. No diagnostic procedures are performed for the purpose of  
93 checking eligibility criteria specifically, i.e., any procedures indicated for the standard of care patient  
94 management will be performed but none will be added to check eligibility criteria.

### 95 **Randomisation and blinding**

96 Participants are randomised with equal probability into two allocation groups: (a) the control group,  
97 receiving the current standard of care at the respective trial site, which may include rapid diagnostic testing  
98 for specific pathogens or syndromic testing with results reported after a longer time than four hours, or (b)  
99 the intervention group, receiving the standard of care plus immediately a nasopharyngeal swab tested with  
100 the BIOFIRE® Respiratory Panel 2.1*plus* (RP2.1*plus*). The intervention is a multiplexed nucleic acid test for  
101 the simultaneous qualitative detection and identification of multiple respiratory viral and bacterial nucleic  
102 acids in nasopharyngeal swabs obtained from patients suspected of respiratory tract infections. The assay is  
103 licensed in CE marked and FDA cleared, for the use intended in this trial. The pathogens included in the

1 104 assay are adenovirus, coronaviruses (229 E, HKU1, NL63, OC43, SARS-CoV-2), human metapneumovirus,  
2  
3 105 human rhinovirus/enterovirus, influenza A, including subtypes H1, H1-2009, and H3, influenza B, middle  
4  
5 106 east respiratory syndrome coronavirus (MERS-CoV), parainfluenza virus (1, 2, 3, 4), respiratory syncytial  
6  
7 107 virus, *Bordetella parapertussis*, *Bordetella pertussis*, *Chlamydia pneumoniae* and *Mycoplasma pneumoniae*.  
8  
9

10 108 After all eligibility criteria have been verified and informed consent has been obtained, randomisation is  
11  
12 109 performed using the built-in randomisation module of the eCRF system. Allocation is concealed until the  
13  
14 110 moment of randomisation. To this end, block randomisation is used with variable blocks of size 2, 4 and 6.  
15  
16 111 Randomisation is stratified by centre. In the intervention group, a URT swab is obtained by trained trial or  
17  
18 112 clinical staff and submitted to the panel assay test with as little delay as possible. After the decision to  
19  
20 113 randomise the subject is made, subjects will not be excluded from the trial. Due to the nature of the  
21  
22 114 intervention, blinding is not possible. If the allocated intervention is not applied for any reason, this will be  
23  
24 115 recorded and follow-up for the participant will be completed.  
25  
26  
27  
28

### 29 116 **Outcome measures and assessments**

30  
31  
32 117 The co-primary study endpoints are:

- 33  
34 118 1. Days alive out of hospital within 14 days after study enrolment
- 35  
36 119 2. Days on Therapy (DOT) with antibiotics within 14 days after study enrolment

37  
38  
39  
40 120 The secondary endpoints are listed in table 2.  
41  
42

#### 43 Non-inferiority safety endpoint:

- 44  
45  
46  
47  
48  
49  
50  
51  
52  
53  
54  
55  
56  
57  
58  
59  
60
- For initially hospitalised patients: i) any readmission, ii) ICU admission => 24 hours after hospitalisation, or iii) death, within 30 days after study enrolment
- For initially non-admitted patients: any admission or death within 30 days after study enrolment.

Direct costs and indirect costs within 30 days after enrolment.

Change in quality of life as determined by EQ-5D-5L (or suitable alternative for age), days away from usual childcare routine or school and healthcare utilisation on day 1, 14, and 30 after enrolment.

|    |                                                                                                          |
|----|----------------------------------------------------------------------------------------------------------|
| 1  | Proportion of participants with an identified respiratory pathogen in both study groups on randomisation |
| 2  |                                                                                                          |
| 3  | day samples.                                                                                             |
| 4  |                                                                                                          |
| 5  | Proportion of participants on non-first-line anti-infective regimens (as defined by local guidelines)    |
| 6  |                                                                                                          |
| 7  | Time to de-escalation and time to stop of anti-infective therapy                                         |
| 8  |                                                                                                          |
| 9  |                                                                                                          |
| 10 | Proportion of hospitalised participants with detection of cephalosporin-, carbapenem- or chinolone-      |
| 11 |                                                                                                          |
| 12 | resistant Enterobacteriaceae on any standard of care samples >7 days after randomisation                 |
| 13 |                                                                                                          |
| 14 | Hours in individual or cohort isolation in hospitalised participants                                     |
| 15 |                                                                                                          |

16  
17 121 Table 2: Secondary endpoints

18  
19 122 Primary endpoints were adapted after a decision to terminate the recruitment of adult patients on a  
20  
21 partner protocol on 3rd May 2022. Prior to this adaptation, the non-inferiority safety endpoint was  
22 123  
23 considered a third co-primary endpoint. Because mortality in the study population in high-resource settings  
24 124  
25 is extremely low, and secondary admission rates among children initially managed in the community as well  
26 125  
27 as re-admission and secondary ICU admission rates among primarily admitted children are likely to be in  
28 126  
29 the range of below 5%, this endpoint was judged to unlikely be relevant or appropriate for the paediatric  
30 127  
31 population. Additionally, secondary admissions will still provide safety information on the first co-primary  
32 128  
33 endpoint. Based on this, the safety endpoint is considered a key secondary endpoint.  
34  
35 129

36  
37  
38 130 Participants are followed up until 30 days after randomisation. Standard of care clinical and microbiological  
39  
40 131 data are collected. The participant dataset summarises the illness episode and outcome, microbiological  
41  
42 132 testing, antimicrobial use, use of healthcare facilities including hospitalisations and return to normal  
43  
44 activity, childcare arrangements and quality of life. Data is entered into case report forms in a GCP-  
45 133  
46 compliant database held at the Julius Center, UMC Utrecht. Follow-up information including data for health  
47 134  
48 economic analysis is collected on day 14 (visit window: day 12 – 16) and on day 30 (visit window: day 28 –  
49 135  
50 32) after randomisation. Parents or participants themselves (where age-appropriate) are contacted by  
51 136  
52 study staff for the follow-up visits, usually via telephone but in case of hospitalisation or hospital  
53 137  
54 attendance during the visit window face-to-face visits are acceptable. Quality of life is measured by EQ-5D,  
55 138  
56 using age-appropriate versions including proxy versions that are emailed to families. In case of failure to  
57 139  
58 successfully contact families at the end of trial participation, the participant's general practitioner is  
59 140  
60 contacted to complete information on the primary endpoints.  
141

## Sample size and power

In particular, a reduction of one day in antibiotic treatment or increase of one day in days alive out of hospital appear to be relevant for a clinically relevant reduction in antibiotic prescribing and a reduction in hospital costs, respectively. In children, the co-primary superiority endpoints are likely to be dominated by the DOT with antibiotics, as ambulatory exposure to antibiotics is likely to be common in the absence of hospital admission, whereas many admitted children would be expected to be treated with antibiotics as well.

The sample size estimation was performed for this endpoint. From a recent publication on variations in antibiotic prescribing in febrile children presenting to European EDs, the standard deviation for days on antibiotic treatment was estimated as 3.7 days. Based on this, recruitment of 170 children per arm (total of 340 children) will be sufficient to detect a difference of one day in this endpoint (power 80%, alpha 0.05).

To account for uncertainty about the variability in both co-primary endpoints in the paediatric study population, we adopt a highly conservative approach aiming to recruit 252 evaluable children per arm (total of 504 children), resulting in adequate power to detect a difference in one day in both endpoints (table 3).

| SD  | Delta | Alpha | Beta | Correction | Sample size per arm |
|-----|-------|-------|------|------------|---------------------|
| 2.5 | 1     | 0.025 | 0.2  | 1          | 99                  |
| 3.0 | 1     | 0.025 | 0.2  | 1          | 142                 |
| 3.5 | 1     | 0.025 | 0.2  | 1          | 193                 |
| 3.7 | 1     | 0.025 | 0.2  | 1          | 215                 |
| 4.0 | 1     | 0.025 | 0.2  | 1          | 252                 |
| 4.5 | 1     | 0.025 | 0.2  | 1          | 318                 |
| 5.0 | 1     | 0.025 | 0.2  | 1          | 393                 |

Table 3: Sample sizes for Days on antibiotic treatment (paediatric) using different assumptions

## Analysis plan

The analysis will be performed by the trial statistician using the R language and environment for statistical computing (version 3.6 or higher). Reporting will follow the CONSORT guidelines.

1 161 Both co-primary endpoints will be tested separately, and superiority is confirmed if either one or both are  
2  
3 162 superior in terms of the primary analysis.  
4  
5

6 163 To investigate differences between the two arms for each endpoint separately, a two-sample t-test of the  
7  
8 164 log transformed mean time (in hours) on antibiotic treatment or alive out of hospital comparing those on  
9  
10 165 the standard of care arm (control) and the intervention arm will be performed, assuming a pooled variance  
11  
12 166 estimate.  
13  
14

15 167 An adjusted linear mixed effects model will be fitted with log transformed days on antibiotic treatment or  
16  
17 168 days alive out of hospital as dependent variable, and an indicator variable for the randomised arm, age  
18  
19 169 groups (<5y, 5-17y) and comorbidities (stratified according to modified Charlson comorbidity index: 0, 1,  
20  
21 170 +1) as independent variables. Further independent variables will be considered in post hoc analyses. The  
22  
23 171 model will include a random intercept for each country (and potentially, emergency department in country  
24  
25 172 if cluster sizes allow). Zero-inflated or similar models will be considered if data are heavily skewed.  
26  
27  
28

29 173 We especially anticipate days alive out of hospital data to be heavily right skewed in the full analysis set,  
30  
31 174 and therefore suitable transformations or modelling approaches will be considered as appropriate.  
32  
33  
34

35 175 Subgroup analyses of the primary endpoints will include

- 36  
37 176 • by age groups (<5, >5)
- 38  
39 177 • by admission at baseline (yes/no)
- 40  
41 178 • by receipt of antibiotics at baseline (yes/no)
- 42  
43 179 • for those on antibiotic therapy at baseline, we will dichotomise days on treatment into two groups  
44  
45 180 (0="1-5 days", 1=">5 days"), and fit a (mixed effects) logistic model with this grouping as  
46  
47 181 dependent variable, adjusting as above.  
48  
49  
50 182 • by country
- 51  
52 183 • by emergency department (if the number of patients allows).  
53  
54  
55

56 184 A detailed analysis plan for all secondary objectives will be finalised before the trial's data base closure and  
57  
58 185 will be under version control at the Paediatric Research Centre, University of Basel Children's Hospital.  
59  
60

## 186 **Sub-study and biobanking**

1 187 The sub-study will have its own analysis plan which will be finalised before the respective database is  
2  
3 188 locked.

5 189 The aim of the microbiology study, located at the University of Antwerp, is to use suitable methods,  
6  
7 190 including metagenomic sequencing, to characterise changes in microbiological colonisation and  
8  
9 antimicrobial resistance patterns dependent on treatment with antibiotics. In a subset of study sites and  
10 191 participants (up to 150 participants), additional oropharyngeal samples are obtained from participants. One  
11  
12 192 sample is obtained on the day of randomisation and one sample on day 30 (visit window: day 28 – 32) after  
13  
14 193 randomisation. Specific procedures for collection and processing are provided to sites. After receiving  
15  
16 194 specific instructions, the day 30 swab can be obtained at home and sent to the local study site via mail.  
17  
18 195 Inclusion in the microbiology study will require separate informed consent.  
19  
20  
21 196

24 197 Biological samples obtained for the study (including leftovers from the specimens obtained for the  
25  
26 198 intervention and for the microbiology study) are be stored at all sites and shipped to the University of  
27  
28 199 Antwerp for inclusion in a biobank, subject to the condition that separate informed consent for biobanking  
29  
30 200 is given.

33 201 Participation in the main study does not depend on consent for the microbiology study or for biobanking.

## 36 202 **Monitoring**

39 203 Representatives of the trial management team and a designated study monitor conducted a remote site  
40  
41 204 initiation visit at each study site to verify qualifications of the local investigators and inform the local teams  
42  
43 205 of responsibilities and the procedures for ensuring adequate and correct documentation and use of the  
44  
45 206 electronic data capture system as well as providing training on implementing all trial activities.  
46  
47  
48

49 207 Sites are requested to enter data in the eCRF within 5 working days following each subject's visit. The  
50  
51 208 monitor ensures that data is entered in a timely manner. When queries regarding the data entered in the  
52  
53 209 eCRF are raised, the site is expected to resolve them within 10 working days.

56 210 The monitor visits a site at least once during the course of the study, when at least 3 subjects are  
57  
58 211 randomised and completed data collection in the eCRF up to at least Day 30. Depending on the subject  
59  
60 212 enrollment rate and any site-specific issues, the total number of on-site monitoring visits may be increased.

1 213 The visits include Source Data Verification (SDV) for selected variables: 100% SDV is performed on all  
2  
3 214 Informed Consent Form (ICF) versions and consent process in the source; a total of 10% of subjects (always  
4  
5 215 including the first 3 randomised subjects, thereafter randomly selected) have SDV performed on the  
6  
7 216 primary and secondary endpoint CRFs. 100% (S)AEs, (S)ADEs and DD that are reported in accordance with  
8  
9  
10 217 the study protocol, including potential unreported events for these subjects reviewed.  
11  
12  
13 218 In accordance with ICH GCP guidelines,[11] audits may be performed by the ethics committees and  
14  
15 219 competent authorities during the course of the study.  
16  
17  
18 220

For peer review only

## ETHICS AND DISSEMINATION

### Ethical and regulatory compliance

Prior to study conduct, protocol, proposed patient information, consent form and other study-specific

documents were approved by all local ethics committees, with the first approval received in Switzerland

(Ethikkommission Nordwest- und Zentralschweiz (2021-00713)). The current protocol version is 4.0. The

trial is sponsored by the Penta Foundation, Corso Stati Uniti, 4, 35127 Padova, Italy.

Before commencement of the trial, a risk classification following the ISO 201916 standard and ICH-GCP E6

guidelines was carried out. The risk classification of the ADEQUATE Study is defined as negligible, because

participation in the intervention group has no significant additional risks compared to the standard of care.

This study is registered on <https://clinicaltrials.gov> (NCT04781530).

The study is carried out according to the protocol and with principles enunciated in the current version of

the Declaration of Helsinki,[12] the guidelines of Good Clinical Practice (GCP) issued by ICH,[11] in case of

medical device: the European Directive on medical devices 93/42/EEC and the ISO Norm 14155,[13].

### Patient and Public Involvement

This protocol was written without patient involvement. Patients or guardians were not invited to comment

on the study design or to contribute to the writing or editing of this document for readability or accuracy.

### Dissemination of results

The data from all centres will be analysed together and published as soon as possible in peer-reviewed

journals, as well as being presented at national or international conferences.

The results of this trial will be submitted for Open Access publication in high impact peer-reviewed journals

likely to be read by health professionals in the management of ARI in children in Europe. The work will be

presented at key medical conferences. To maximise the impact of the trial across Europe, its findings will be



1 245 disseminated more widely through abstracts for oral and poster presentations submitted to some of the  
2  
3 246 main relevant national and international conferences.  
4  
5  
6 247 Findings will further be distributed through activities of the VALUE-Dx consortium's workpackage 6,  
7  
8 248 including press releases, the consortium website and educational activities and materials. The social media  
9  
10 249 presence of the organisations involved will also be used to highlight news about the trial.  
11

12  
13 250  
14  
15  
16  
17  
18  
19  
20  
21  
22  
23  
24  
25  
26  
27  
28  
29  
30  
31  
32  
33  
34  
35  
36  
37  
38  
39  
40  
41  
42  
43  
44  
45  
46  
47  
48  
49  
50  
51  
52  
53  
54  
55  
56  
57  
58  
59  
60

For peer review only

## TRIAL STATUS AND DISCUSSION

Currently, 348 children have been enrolled in the trial. Follow-up has been completed for x and x have missed the 14d and 28d follow-up visit, but data on primary endpoints may still be completed following GP enquiry. Recruitment accrual is at 67% of target.

A 2014 Cochrane Review found a trend towards reduced antibiotic use with use of rapid syndromic tests in paediatric EDs.[14] Since then, two single-centre randomised controlled trials (RCT), one from Finland and one from the US, found no effect of a similar test as used in our trial on antibiotic prescribing in EDs.[15, 16] Both trials employed a similar strategy of approaching children at an early point in time and before clinical assessment. Our trial differs in that children for whom (a) a fixed decision to admit them had already been made, e.g. as part of a treatment guideline or local standard operating procedure, or (b) where it was deemed obvious by clinicians that neither antibiotics nor hospitalisation were considered, are excluded from the trial. Also, both trials did not investigate duration of antibiotics, thereby potentially missing an effect on antibiotic use if results from the test would make clinicians more likely to stop antibiotics early. Finally, both trials were designed to show a difference in antibiotic prescribing but did not complement this with decisions to hospitalise patients. Thus, our trial adds to the previous literature

- by employing the same protocol across a range of different settings,
- by studying the intervention in a population in which clinicians express an initial degree of uncertainty about management,
- by treating hospitalisation and its duration as equally important effects of a rapid syndromic test as treatment with antibiotics,
- and by capturing delayed effects of the test on both

The trial's primary endpoint was adapted after the start of the trial. Although this is often considered acceptable, it is still a decision that needs careful deliberation and explanation. The ADEQUATE trial was initially designed as two partner trials in EDs, one in the adult and one in the paediatric population. The primary outcomes were planned to be analysed together, thus a safety non-inferiority endpoint with high relevance mainly for the adult population was introduced into the primary endpoints. Because of the low risk of meeting this endpoint, demonstrating non-inferiority was dominating the sample size estimation for the paediatric trial. Following the obligation to restrict the number of individuals in clinical trials to the

1 279 number necessary to generate robust findings, we decided to move the non-inferiority endpoint to the  
2  
3 280 secondary endpoints as soon as the adult trial was terminated due to changes in routine care making the  
4  
5 281 trial unfeasible.  
6  
7

8 282 Paediatric ARI is a common condition with diverse aetiology. A diagnostic intervention reducing length of  
9  
10 283 hospital stay and antibiotics has a high potential to (a) reduce strain on healthcare resources, (b) reduce  
11  
12 284 evolution of antimicrobial resistance and (c) improve children's and parents' well-being. The ADEQUATE  
13  
14  
15 285 trial will provide conclusive evidence on the effectiveness of a rapid syndromic test for this purpose.  
16  
17

18 286  
19  
20  
21  
22  
23  
24  
25  
26  
27  
28  
29  
30  
31  
32  
33  
34  
35  
36  
37  
38  
39  
40  
41  
42  
43  
44  
45  
46  
47  
48  
49  
50  
51  
52  
53  
54  
55  
56  
57  
58  
59  
60

For peer review only

**STATEMENTS****A. contributorship statement**

289 Conceptualisation: Cristina Prat Aymerich, Malte Kohns Vasconcelos, Andrew Atkinson, Henri van

290 Werkhoven, Surbhi Malhotra-Kumar, Herman Goossens, Marc Bonten, Julia A. Bielicki

291 Data curation: Elia Vitale, Emma Gardiner, Lisa Capozzi, Maggie Nyirenda Nyang'wa, Giulia Brigadoi, Cecilia

292 Liberati, Chiara Minotti, Daniele Donà, Argyro Ftergioti, Maria Kitsou, Manuel Gijón, Maike Seyfried, Hanna

293 Renk, Louisa Brock, Cecilia Hultin

294 Funding acquisition: Herman Goossens, Maarten J. Postma, Fernando Antonanzas

295 Investigation: Malte Kohns Vasconcelos, Anthony Hemeson, Alexander Ross, Maggie Nyirenda Nyang'wa,

296 Giulia Brigadoi, Cecilia Liberati, Chiara Minotti, Daniele Donà, Maria Simitopoulou, Kalliopi Pantzartzi,

297 Kostas Zarras, Argyro Ftergioti, Maria Kitsou, Manuel Gijón, Rosa Calderón, Fátima Machín, Laura Cabello,

298 Andrea Seoane, Sofía Mesa, Lidia Oviedo, Luisa Barón, Ann-Kathrin Stiegler, Carmen Junk, Kristina Kiesel,

299 Maren Belschner, Maike Seyfried, Louisa Brock, Louise F Hill, Aggeliki Syggelou, Maria Tsolia, Rahel Berger,

300 Leon Pfeiffer, Emanuela Früh, Elena Robinson, Andrea Marten, Leen Timbermont, Juan Pablo Rodriguez

301 Ruiz, Simon van der Pol, Pim van Dorst, Thea van Asselt, Fernando Antonanzas, Marino Gonzales, Paula

302 Rojas

303 Methodology: Andrew Atkinson, Henri van Werkhoven, Cristina Prat Aymerich, Malte Kohns Vasconcelos,

304 Leen Timbermont, Juan Pablo Rodriguez Ruiz, Surbhi Malhotra-Kumar, Maarten J. Postma, Herman

305 Goossens, Marc Bonten, Julia A. Bielicki

306 Project administration: Giulio Vecchia, Elia Vitale, Federica D'Ambrosio, Wietske Bouwman, Marjolein van

307 Esschoten, Alessia Severi Conti, Giulia Brigadoi, Cecilia Liberati, Daniele Donà, Maria Kitsou, Manuel Gijón,

308 Pablo Rojo, Maike Seyfried, Kristina Schmauder, Silke Peter, Hanna Renk, Louisa Brock, Cecilia Hultin, Louise

309 F Hill, Claudia Werner, Frank Leus, David de Pooter, Leen Timbermont, Juan Pablo Rodriguez Ruiz, Benjamin

310 Hommel, Marie Tessonneau, Yasmine Yau

1 311 Formal analysis: Simon van der Pol, Pim van Dorst, Thea van Asselt, Fernando Antonanzas, Marino  
2  
3 312 Gonzales, Paula Rojas  
4  
5  
6 313 Software: Simon van der Pol, Pim van Dorst  
7  
8  
9  
10 314 Resources: Florence Allantaz, Maggie Nyirenda Nyang'wa, Gianluca Gualco, Federica Vanoni, Daniele Donà,  
11  
12 315 Aristeia Karypiadou, Charis Lampada, Konstantina Charisi, Parthena Savvidou, Olga Tsiatsiou, Elsa Chorafa,  
13  
14 316 Elisavet Michailidou, Manuel Gijón, Fátima Machín, Irene Hernández, Tobias Walter, Dominic Imort, Fabian  
15  
16  
17 317 Behret, Philippe Cleuziat  
18  
19  
20 318 Supervision: Dalia Dawoud, Claire Hawksworth, Anthony Hemeson, Maggie Nyirenda Nyang'wa, Daniele  
21  
22 319 Donà, Emmanuel Roilides, Elias Iosifidis, Manuel Gijón, Pablo Rojo, Silke Peter, Hanna Renk, Maria Tsolia,  
23  
24  
25 320 Cristina Prat Aymerich, Jean-Louis Tissier, Florence Allantaz, Philippe Cleuziat, Maarten J. Postma, Herman  
26  
27 321 Goossens, Marc Bonten, Julia A. Bielicki  
28  
29  
30 322 Writing – original draft: Malte Kohns Vasconcelos, Cristina Prat Aymerich, Henri van Werkhoven, Marc  
31  
32  
33 323 Bonten, Julia A. Bielicki  
34  
35  
36 324 Writing – review & editing: all authors  
37  
38 325  
39  
40  
41 326 **B. competing interests**  
42  
43 327 Benjamin Hommel, Marie Tessonneau, Sophie Vandepitte, Jean-Louis Tissier, Florence Allantaz and Philippe  
44  
45 328 Cleuziat are employees of bioMérieux, the manufacturer of the diagnostic tool under study in this trial.  
46  
47 329 They were involved in the administration of the trial, provided resources and monitored the trial progress.  
48  
49  
50 330 They were not involved in the design or analysis of the trial. The other authors have no potential conflict of  
51  
52 331 interest to disclose.  
53  
54 332  
55  
56 333 **C. funding**  
57  
58  
59 334 This project has received funding from the Innovative Medicines Initiative 2 Joint Undertaking under grant  
60  
335 agreement No 820755. This Joint Undertaking receives support from the European Union's Horizon 2020

1 336 research and innovation programme and EFPIA and bioMérieux SA, Janssen Pharmaceutica NV, Accelerate  
2  
3 337 Diagnostics S.L., Abbott, Bio-Rad Laboratories, BD Switzerland Sàrl, and The Wellcome Trust Limited.  
4

5 338  
6

7 339 **D. data sharing statement**

8  
9  
10 340 The article does not contain a report on analysed data.  
11  
12  
13  
14  
15  
16  
17  
18  
19  
20  
21  
22  
23  
24  
25  
26  
27  
28  
29  
30  
31  
32  
33  
34  
35  
36  
37  
38  
39  
40  
41  
42  
43  
44  
45  
46  
47  
48  
49  
50  
51  
52  
53  
54  
55  
56  
57  
58  
59  
60

For peer review only

1 341 **References**

2

3

4 342 1. O'Connor R, O'Doherty J, O'Regan A, Dunne C. Antibiotic use for acute respiratory tract infections  
5 343 (ARTI) in primary care; what factors affect prescribing and why is it important? A narrative review. *Ir J Med*  
6 344 *Sci.* 2018;**187**:969-86 doi: 10.1007/s11845-018-1774-5 [published Online First: 2018/03/14].

7 345 2. Prat C, Lacombe A. Bacteria in the respiratory tract-how to treat? Or do not treat? *Int J Infect Dis.*  
8 346 2016;**51**:113-22 doi: 10.1016/j.ijid.2016.09.005 [published Online First: 2016/10/26].

9 347 3. Langer S, Horn J, Gottschick C, *et al.* Symptom Burden and Factors Associated with Acute  
10 348 Respiratory Infections in the First Two Years of Life-Results from the LoewenKIDS Cohort. *Microorganisms.*  
11 349 2022;**10** doi: 10.3390/microorganisms10010111 [published Online First: 2022/01/22].

12 350 4. Cassini A, Högberg LD, Plachouras D, *et al.* Attributable deaths and disability-adjusted life-years  
13 351 caused by infections with antibiotic-resistant bacteria in the EU and the European Economic Area in 2015: a  
14 352 population-level modelling analysis. *Lancet Infect Dis.* 2019;**19**:56-66 doi: 10.1016/s1473-3099(18)30605-4  
15 353 [published Online First: 2018/11/10].

16 354 5. Naylor NR, Atun R, Zhu N, *et al.* Estimating the burden of antimicrobial resistance: a systematic  
17 355 literature review. *Antimicrobial resistance and infection control.* 2018;**7**:58 doi: 10.1186/s13756-018-0336-y  
18 356 [published Online First: 2018/05/02].

19 357 6. Shrestha P, Cooper BS, Coast J, *et al.* Enumerating the economic cost of antimicrobial resistance per  
20 358 antibiotic consumed to inform the evaluation of interventions affecting their use. *Antimicrobial resistance*  
21 359 *and infection control.* 2018;**7**:98 doi: 10.1186/s13756-018-0384-3 [published Online First: 2018/08/18].

22 360 7. Kohns Vasconcelos M, Renk H, Popielska J, *et al.* SARS-CoV-2 testing and infection control strategies  
23 361 in European paediatric emergency departments during the first wave of the pandemic. *Eur J Pediatr.*  
24 362 2020:1-7 doi: 10.1007/s00431-020-03843-w [published Online First: 2020/10/15].

25 363 8. Kohns Vasconcelos M, Loens K, Sigfrid L, *et al.* Aetiology of acute respiratory infection in preschool  
26 364 children requiring hospitalisation in Europe-results from the PED-MERMAIDS multicentre case-control  
27 365 study. *BMJ Open Respir Res.* 2021;**8** doi: 10.1136/bmjresp-2021-000887 [published Online First:  
28 366 2021/07/31].

29 367 9. PPAS4 Paediatric Group. Antibiotics and uncertainty of diagnosis in viral respiratory infections:  
30 368 point-prevalence survey across 15 European countries. *Acta Paediatr.* 2023; doi: 10.1111/apa.16855  
31 369 [published Online First: 2023/05/25].

32 370 10. Kohns Vasconcelos M, Meyer Sauter PM, Santoro R, *et al.* Randomised placebo-controlled  
33 371 multicentre effectiveness trial of adjunct betamethasone therapy in hospitalised children with community-  
34 372 acquired pneumonia: a trial protocol for the KIDS-STEP trial. *BMJ open.* 2020;**10**:e041937 doi:  
35 373 10.1136/bmjopen-2020-041937 [published Online First: 2020/12/31].

36 374 11. International Conference on Harmonization. E6 Guideline for Good Clinical Practice. 1996.

37 375 12. Declaration of Helsinki. Version October 2013.

38 376 13. ISO 14155, Clinical investigation of medical devices for human subjects -- Good clinical practice.  
39 377 2011.

40 378 14. Doan Q, Enarson P, Kissoon N, Klassen TP, Johnson DW. Rapid viral diagnosis for acute febrile  
41 379 respiratory illness in children in the Emergency Department. *Cochrane Database of Systematic Reviews.*  
42 380 2014; doi: 10.1002/14651858.CD006452.pub4 [published Online].

43 381 15. Rao S, Lamb MM, Moss A, *et al.* Effect of Rapid Respiratory Virus Testing on Antibiotic Prescribing  
44 382 Among Children Presenting to the Emergency Department With Acute Respiratory Illness: A Randomized  
45 383 Clinical Trial. *JAMA Network Open.* 2021;**4**:e2111836-e doi: 10.1001/jamanetworkopen.2021.11836  
46 384 [published Online].

47 385 16. Mattila S, Paalanne N, Honkila M, Pokka T, Tapiainen T. Effect of Point-of-Care Testing for  
48 386 Respiratory Pathogens on Antibiotic Use in Children: A Randomized Clinical Trial. *JAMA Network Open.*  
49 387 2022;**5**:e2216162-e doi: 10.1001/jamanetworkopen.2022.16162 [published Online].

50

51 388

52

53

54

55

56

57

58

59

60

## Acknowledgements

We thank all members of the trial committees, all families and children who have taken part, and all participating sites for their invaluable contributions to the trial.

ADEQUATE Paediatric Trial Group:

Clinical Operations: Yasmine Yau, Elia Vitale, Giulio Vecchia, Federica D'Ambrosio, Wietske Bouwman, Marjolein van Esschoten, Frank Leus, David de Pooter, Leen Timbermont, Juan Pablo Rodriguez Ruiz, Benjamin Hommel, Marie Tessonneau, Malte Kohns Vasconcelos

Microbiology sub-study and biobanking: Leen Timbermont, Juan Pablo Rodriguez Ruiz, Surbhi Malhotra-Kumar

Health Economics Analysis: Benjamin Hommel, Marie Tessonneau, Florence Allantaz, Sophie Vandepitte, Jean-Louis Tissier, Philippe Cleuziat, Maarten J. Postma, Thea van Asselt, Pim van Dorst, Simon van der Pol, Fernando Antonanzas, Paula Rojas, Marino Gonzales, Dalia Dawoud, Claire Hawksworth

Data Safety Monitoring Board: Mark Lyttle, Harry Heijerman, Michelle Clements

Trial Steering Committee: Cristina Prat Aymerich, Florence Allantaz, Philippe Cleuziat, Herman Goossens, Marc Bonten, Julia A. Bielicki

Coordinating Investigator: Malte Kohns Vasconcelos

Trial statistician and methodologist: Andrew Atkinson, Henri van Werkhoven

Chief Investigator: Julia A. Bielicki

Trial Sites:

Aristotle University School of Health Sciences, Hippokration General Hospital, Thessaloniki: Maria Simitopoulou, Kalliopi Pantartzzi, Kostas Zarras, Argyro Ftergioti, Maria Kitsou, Aristeia Karypiadou, Charis Lampada, Konstantina Charisi, Parthena Savvidou, Olga Tsiatsiou, Elsa Chorafa, Elisavet Michailidou, Emmanuel Roilides, Elias Iosifidis



- 1 412 University Hospital Tübingen: Ann-Kathrin Stiegler, Carmen Junk, Kristina Kiesel, Maren Belschner, Maike  
2  
3 413 Seyfried, Kristina Schmauder, Silke Peter, Tobias Walter, Dominic Imort, Fabian Behret, Hanna Renk  
4  
5  
6 414 Universitäts-Kinderspital beider Basel (UKBB): Rahel Berger, Leon Pfeiffer, Emanuela Früh, Elena Robinson,  
7  
8 415 Andrea Marten, Claudia Werner, Malte Kohns Vasconcelos, Julia A. Bielicki  
9  
10  
11 416 Hospital Universitario 12 de Octubre, Madrid: Manuel Gijón, Rosa Calderón, Fátima Machín, Laura  
12  
13 417 Cabello, Andrea Seoane, Sofía Mesa, Lidia Oviedo, Luisa Barón, Irene Hernández, Pablo Rojo  
14  
15  
16 418 University Hospital Lewisham: Emma Gardiner, Lisa Capozzi, Alexander Ross, Anthony Hemeson, Maggie  
17  
18 419 Nyirenda Nyang'wa  
19  
20  
21 420 St. George's Hospital, London: Louisa Brock, Cecilia Hultin, Louise F Hill  
22  
23  
24 421 Azienda Ospedaliera Universitaria di Padova: Giulia Brigadoi, Cecilia Liberati, Chiara Minotti, Daniele Donà  
25  
26  
27 422 Ospedale Regionale di Bellinzona e Valli: Alessia Severi Conti, Gianluca Gualco, Federica Vanoni  
28  
29  
30 423 National and Kapodistrian University of Athens (NKUA) School of Medicine, Agia Sophia Children's Hospital:  
31  
32 424 Aggeliki Syggelou, Maria Tsolia  
33  
34  
35  
36  
37  
38  
39  
40  
41  
42  
43  
44  
45  
46  
47  
48  
49  
50  
51  
52  
53  
54  
55  
56  
57  
58  
59  
60

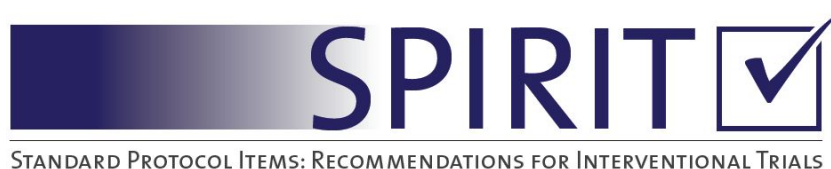

STANDARD PROTOCOL ITEMS: RECOMMENDATIONS FOR INTERVENTIONAL TRIALS

SPIRIT 2013 Checklist: Recommended items to address in a clinical trial protocol and related documents\*

| Section/item                      | Item No | Description                                                                                                                                                                                                                                                                                                                                |
|-----------------------------------|---------|--------------------------------------------------------------------------------------------------------------------------------------------------------------------------------------------------------------------------------------------------------------------------------------------------------------------------------------------|
| <b>Administrative information</b> |         |                                                                                                                                                                                                                                                                                                                                            |
| Title ✓                           | 1       | Descriptive title identifying the study design, population, interventions, and, if applicable, trial acronym                                                                                                                                                                                                                               |
| Trial registration ✓              | 2a      | Trial identifier and registry name. If not yet registered, name of intended registry                                                                                                                                                                                                                                                       |
|                                   | 2b      | All items from the World Health Organization Trial Registration Data Set                                                                                                                                                                                                                                                                   |
| Protocol version I225             | 3       | Date and version identifier                                                                                                                                                                                                                                                                                                                |
| Funding ✓                         | 4       | Sources and types of financial, material, and other support                                                                                                                                                                                                                                                                                |
| Roles and responsibilities        | 5a      | Names, affiliations, and roles of protocol contributors <b>contributor statement and acknowledgements</b>                                                                                                                                                                                                                                  |
|                                   | 5b      | Name and contact information for the trial sponsor named <b>I225-6</b>                                                                                                                                                                                                                                                                     |
|                                   | 5c      | Role of study sponsor and funders, if any, in study design; collection, management, analysis, and interpretation of data; writing of the report; and the decision to submit the report for publication, including whether they will have ultimate authority over any of these activities <b>contributor statement and acknowledgements</b> |
|                                   | 5d      | Composition, roles, and responsibilities of the coordinating centre, steering committee, endpoint adjudication committee, data management team, and other individuals or groups overseeing the trial, if applicable (see Item 21a for data monitoring committee) <b>contributor statement and acknowledgements</b>                         |
| <b>Introduction</b>               |         |                                                                                                                                                                                                                                                                                                                                            |
| Background and rationale          | 6a      | Description of research question and justification for undertaking the trial, including summary of relevant studies (published and unpublished) examining benefits and harms for each intervention <b>I36-61, 65-7, 255-7</b>                                                                                                              |
|                                   | 6b      | Explanation for choice of comparators <b>I56-61</b>                                                                                                                                                                                                                                                                                        |
| Objectives                        | 7       | Specific objectives or hypotheses <b>I69-72</b>                                                                                                                                                                                                                                                                                            |

|    |                                                                     |     |                                                                                                                                                                                                                                                                                                                                                                                                                    |
|----|---------------------------------------------------------------------|-----|--------------------------------------------------------------------------------------------------------------------------------------------------------------------------------------------------------------------------------------------------------------------------------------------------------------------------------------------------------------------------------------------------------------------|
| 1  |                                                                     |     |                                                                                                                                                                                                                                                                                                                                                                                                                    |
| 2  | Trial design                                                        | 8   | Description of trial design including type of trial (eg, parallel group, crossover, factorial, single group), allocation ratio, and framework (eg, superiority, equivalence, noninferiority, exploratory) <b>  69,96,145</b>                                                                                                                                                                                       |
| 3  |                                                                     |     |                                                                                                                                                                                                                                                                                                                                                                                                                    |
| 4  |                                                                     |     |                                                                                                                                                                                                                                                                                                                                                                                                                    |
| 5  |                                                                     |     |                                                                                                                                                                                                                                                                                                                                                                                                                    |
| 6  |                                                                     |     |                                                                                                                                                                                                                                                                                                                                                                                                                    |
| 7  |                                                                     |     |                                                                                                                                                                                                                                                                                                                                                                                                                    |
| 8  | <b>Methods: Participants, interventions, and outcomes</b>           |     |                                                                                                                                                                                                                                                                                                                                                                                                                    |
| 9  |                                                                     |     |                                                                                                                                                                                                                                                                                                                                                                                                                    |
| 10 | Study setting                                                       | 9   | Description of study settings (eg, community clinic, academic hospital) and list of countries where data will be collected. Reference to where list of study sites can be obtained <b>  73-6</b>                                                                                                                                                                                                                   |
| 11 |                                                                     |     |                                                                                                                                                                                                                                                                                                                                                                                                                    |
| 12 |                                                                     |     |                                                                                                                                                                                                                                                                                                                                                                                                                    |
| 13 |                                                                     |     |                                                                                                                                                                                                                                                                                                                                                                                                                    |
| 14 | Eligibility criteria                                                | 10  | Inclusion and exclusion criteria for participants. If applicable, eligibility criteria for study centres and individuals who will perform the interventions (eg, surgeons, psychotherapists) <b>table 1,   84-8</b>                                                                                                                                                                                                |
| 15 |                                                                     |     |                                                                                                                                                                                                                                                                                                                                                                                                                    |
| 16 |                                                                     |     |                                                                                                                                                                                                                                                                                                                                                                                                                    |
| 17 |                                                                     |     |                                                                                                                                                                                                                                                                                                                                                                                                                    |
| 18 |                                                                     |     |                                                                                                                                                                                                                                                                                                                                                                                                                    |
| 19 | Interventions                                                       | 11a | Interventions for each group with sufficient detail to allow replication, including how and when they will be administered <b>  100-12</b>                                                                                                                                                                                                                                                                         |
| 20 |                                                                     |     |                                                                                                                                                                                                                                                                                                                                                                                                                    |
| 21 |                                                                     |     |                                                                                                                                                                                                                                                                                                                                                                                                                    |
| 22 |                                                                     | 11b | Criteria for discontinuing or modifying allocated interventions for a given trial participant (eg, drug dose change in response to harms, participant request, or improving/worsening disease) <b>n/a</b>                                                                                                                                                                                                          |
| 23 |                                                                     |     |                                                                                                                                                                                                                                                                                                                                                                                                                    |
| 24 |                                                                     |     |                                                                                                                                                                                                                                                                                                                                                                                                                    |
| 25 |                                                                     |     |                                                                                                                                                                                                                                                                                                                                                                                                                    |
| 26 |                                                                     |     |                                                                                                                                                                                                                                                                                                                                                                                                                    |
| 27 |                                                                     | 11c | Strategies to improve adherence to intervention protocols, and any procedures for monitoring adherence (eg, drug tablet return, laboratory tests) <b>n/a</b>                                                                                                                                                                                                                                                       |
| 28 |                                                                     |     |                                                                                                                                                                                                                                                                                                                                                                                                                    |
| 29 |                                                                     |     |                                                                                                                                                                                                                                                                                                                                                                                                                    |
| 30 |                                                                     |     |                                                                                                                                                                                                                                                                                                                                                                                                                    |
| 31 |                                                                     | 11d | Relevant concomitant care and interventions that are permitted or prohibited during the trial <b>  96-9</b>                                                                                                                                                                                                                                                                                                        |
| 32 |                                                                     |     |                                                                                                                                                                                                                                                                                                                                                                                                                    |
| 33 |                                                                     |     |                                                                                                                                                                                                                                                                                                                                                                                                                    |
| 34 | Outcomes                                                            | 12  | Primary, secondary, and other outcomes, including the specific measurement variable (eg, systolic blood pressure), analysis metric (eg, change from baseline, final value, time to event), method of aggregation (eg, median, proportion), and time point for each outcome. Explanation of the clinical relevance of chosen efficacy and harm outcomes is strongly recommended <b>respective section (  116ff)</b> |
| 35 |                                                                     |     |                                                                                                                                                                                                                                                                                                                                                                                                                    |
| 36 |                                                                     |     |                                                                                                                                                                                                                                                                                                                                                                                                                    |
| 37 |                                                                     |     |                                                                                                                                                                                                                                                                                                                                                                                                                    |
| 38 |                                                                     |     |                                                                                                                                                                                                                                                                                                                                                                                                                    |
| 39 |                                                                     |     |                                                                                                                                                                                                                                                                                                                                                                                                                    |
| 40 |                                                                     |     |                                                                                                                                                                                                                                                                                                                                                                                                                    |
| 41 |                                                                     |     |                                                                                                                                                                                                                                                                                                                                                                                                                    |
| 42 | Participant timeline                                                | 13  | Time schedule of enrolment, interventions (including any run-ins and washouts), assessments, and visits for participants. A schematic diagram is highly recommended (see Figure) <b>  130-41, we decided against a diagram because the structure of FU is very simple in this trial</b>                                                                                                                            |
| 43 |                                                                     |     |                                                                                                                                                                                                                                                                                                                                                                                                                    |
| 44 |                                                                     |     |                                                                                                                                                                                                                                                                                                                                                                                                                    |
| 45 |                                                                     |     |                                                                                                                                                                                                                                                                                                                                                                                                                    |
| 46 |                                                                     |     |                                                                                                                                                                                                                                                                                                                                                                                                                    |
| 47 |                                                                     |     |                                                                                                                                                                                                                                                                                                                                                                                                                    |
| 48 |                                                                     |     |                                                                                                                                                                                                                                                                                                                                                                                                                    |
| 49 | Sample size                                                         | 14  | Estimated number of participants needed to achieve study objectives and how it was determined, including clinical and statistical assumptions supporting any sample size calculations <b>respective section (  142ff)</b>                                                                                                                                                                                          |
| 50 |                                                                     |     |                                                                                                                                                                                                                                                                                                                                                                                                                    |
| 51 |                                                                     |     |                                                                                                                                                                                                                                                                                                                                                                                                                    |
| 52 |                                                                     |     |                                                                                                                                                                                                                                                                                                                                                                                                                    |
| 53 |                                                                     |     |                                                                                                                                                                                                                                                                                                                                                                                                                    |
| 54 |                                                                     |     |                                                                                                                                                                                                                                                                                                                                                                                                                    |
| 55 | Recruitment                                                         | 15  | Strategies for achieving adequate participant enrolment to reach target sample size <b>n/a</b>                                                                                                                                                                                                                                                                                                                     |
| 56 |                                                                     |     |                                                                                                                                                                                                                                                                                                                                                                                                                    |
| 57 |                                                                     |     |                                                                                                                                                                                                                                                                                                                                                                                                                    |
| 58 | <b>Methods: Assignment of interventions (for controlled trials)</b> |     |                                                                                                                                                                                                                                                                                                                                                                                                                    |
| 59 |                                                                     |     |                                                                                                                                                                                                                                                                                                                                                                                                                    |
| 60 |                                                                     |     |                                                                                                                                                                                                                                                                                                                                                                                                                    |

## Allocation:

- 1  
2  
3  
4 Sequence generation 16a Method of generating the allocation sequence (eg, computer-generated random numbers), and list of any factors for stratification. To reduce predictability of a random sequence, details of any planned restriction (eg, blocking) should be provided in a separate document that is unavailable to those who enrol participants or assign interventions **II108-11**
- 5  
6  
7  
8  
9  
10  
11  
12 Allocation concealment mechanism 16b Mechanism of implementing the allocation sequence (eg, central telephone; sequentially numbered, opaque, sealed envelopes), describing any steps to conceal the sequence until interventions are assigned **II108-11**
- 13  
14  
15  
16  
17  
18 Implementation 16c Who will generate the allocation sequence, who will enrol participants, and who will assign participants to interventions **II108-11**
- 19  
20  
21 Blinding (masking) 17a Who will be blinded after assignment to interventions (eg, trial participants, care providers, outcome assessors, data analysts), and how **II113-4**
- 22  
23  
24  
25  
26 17b If blinded, circumstances under which unblinding is permissible, and procedure for revealing a participant's allocated intervention during the trial **n/a**
- 27  
28  
29

**Methods: Data collection, management, and analysis**

- 30  
31  
32 Data collection methods 18a Plans for assessment and collection of outcome, baseline, and other trial data, including any related processes to promote data quality (eg, duplicate measurements, training of assessors) and a description of study instruments (eg, questionnaires, laboratory tests) along with their reliability and validity, if known. Reference to where data collection forms can be found, if not in the protocol **II130-41**
- 33  
34  
35  
36  
37  
38  
39  
40 18b Plans to promote participant retention and complete follow-up, including list of any outcome data to be collected for participants who discontinue or deviate from intervention protocols **II139-41**
- 41  
42  
43  
44 Data management 19 Plans for data entry, coding, security, and storage, including any related processes to promote data quality (eg, double data entry; range checks for data values). Reference to where details of data management procedures can be found, if not in the protocol **II133-4, 202ff**
- 45  
46  
47  
48  
49  
50  
51 Statistical methods 20a Statistical methods for analysing primary and secondary outcomes. Reference to where other details of the statistical analysis plan can be found, if not in the protocol **respective section (I158ff)**
- 52  
53  
54  
55  
56 20b Methods for any additional analyses (eg, subgroup and adjusted analyses) **referred to SAP**
- 57  
58  
59  
60

1  
2 20c Definition of analysis population relating to protocol non-adherence  
3 (eg, as randomised analysis), and any statistical methods to handle  
4 missing data (eg, multiple imputation) **referred to SAP**  
5

6 **Methods: Monitoring**  
7

8 Data monitoring 21a Composition of data monitoring committee (DMC); summary of its  
9 role and reporting structure; statement of whether it is independent  
10 from the sponsor and competing interests; and reference to where  
11 further details about its charter can be found, if not in the protocol.  
12 Alternatively, an explanation of why a DMC is not needed  
13 **acknowledgements**  
14  
15  
16 21b Description of any interim analyses and stopping guidelines,  
17 including who will have access to these interim results and make the  
18 final decision to terminate the trial **n/a**  
19  
20  
21 Harms 22 Plans for collecting, assessing, reporting, and managing solicited and  
22 spontaneously reported adverse events and other unintended effects  
23 of trial interventions or trial conduct **table 2 and I1216-7**  
24  
25 Auditing 23 Frequency and procedures for auditing trial conduct, if any, and  
26 whether the process will be independent from investigators and the  
27 sponsor **I1218-9**  
28  
29

30 **Ethics and dissemination**  
31

32 Research ethics 24 Plans for seeking research ethics committee/institutional review  
33 approval board **respective section (I222ff)**  
34  
35 Protocol 25 Plans for communicating important protocol modifications (eg,  
36 amendments outcomes, analyses) to relevant parties  
37 (eg, investigators, REC/IRBs, trial participants, trial registries,  
38 journals, regulators) **respective section (I222ff)**  
39  
40  
41 Consent or 26a Who will obtain informed consent or assent from potential trial  
42 assent participants or authorised surrogates, and how (see Item 32)  
43 **respective section (I83ff)**  
44  
45 26b Additional consent provisions for collection and use of participant  
46 data and biological specimens in ancillary studies, if applicable **I197-**  
47 **210**  
48  
49  
50 Confidentiality 27 How personal information about potential and enrolled participants  
51 will be collected, shared, and maintained in order to protect  
52 confidentiality before, during, and after the trial **I1133-4, 202ff**  
53  
54 Declaration of 28 Financial and other competing interests for principal investigators for  
55 interests the overall trial and each study site **funding and competing interests**  
56 **statements**  
57  
58  
59  
60

|    |                               |     |                                                                                                                                                                                                                                                                                                                        |
|----|-------------------------------|-----|------------------------------------------------------------------------------------------------------------------------------------------------------------------------------------------------------------------------------------------------------------------------------------------------------------------------|
| 1  |                               |     |                                                                                                                                                                                                                                                                                                                        |
| 2  | Access to data                | 29  | Statement of who will have access to the final trial dataset, and disclosure of contractual agreements that limit such access for investigators <b>data sharing statement</b>                                                                                                                                          |
| 3  |                               |     |                                                                                                                                                                                                                                                                                                                        |
| 4  |                               |     |                                                                                                                                                                                                                                                                                                                        |
| 5  |                               |     |                                                                                                                                                                                                                                                                                                                        |
| 6  | Ancillary and post-trial care | 30  | Provisions, if any, for ancillary and post-trial care, and for compensation to those who suffer harm from trial participation <b>n/a</b>                                                                                                                                                                               |
| 7  |                               |     |                                                                                                                                                                                                                                                                                                                        |
| 8  |                               |     |                                                                                                                                                                                                                                                                                                                        |
| 9  | Dissemination policy          | 31a | Plans for investigators and sponsor to communicate trial results to participants, healthcare professionals, the public, and other relevant groups (eg, via publication, reporting in results databases, or other data sharing arrangements), including any publication restrictions <b>respective section (I239ff)</b> |
| 10 |                               |     |                                                                                                                                                                                                                                                                                                                        |
| 11 |                               |     |                                                                                                                                                                                                                                                                                                                        |
| 12 |                               |     |                                                                                                                                                                                                                                                                                                                        |
| 13 |                               |     |                                                                                                                                                                                                                                                                                                                        |
| 14 |                               |     |                                                                                                                                                                                                                                                                                                                        |
| 15 |                               |     |                                                                                                                                                                                                                                                                                                                        |
| 16 |                               | 31b | Authorship eligibility guidelines and any intended use of professional writers <b>n/a</b>                                                                                                                                                                                                                              |
| 17 |                               |     |                                                                                                                                                                                                                                                                                                                        |
| 18 |                               |     |                                                                                                                                                                                                                                                                                                                        |
| 19 |                               |     |                                                                                                                                                                                                                                                                                                                        |
| 20 |                               | 31c | Plans, if any, for granting public access to the full protocol, participant-level dataset, and statistical code <b>none available yet</b>                                                                                                                                                                              |
| 21 |                               |     |                                                                                                                                                                                                                                                                                                                        |
| 22 |                               |     |                                                                                                                                                                                                                                                                                                                        |
| 23 | <b>Appendices</b>             |     |                                                                                                                                                                                                                                                                                                                        |
| 24 |                               |     |                                                                                                                                                                                                                                                                                                                        |
| 25 | Informed consent materials    | 32  | Model consent form and other related documentation given to participants and authorised surrogates <b>supplement</b>                                                                                                                                                                                                   |
| 26 |                               |     |                                                                                                                                                                                                                                                                                                                        |
| 27 |                               |     |                                                                                                                                                                                                                                                                                                                        |
| 28 | Biological specimens          | 33  | Plans for collection, laboratory evaluation, and storage of biological specimens for genetic or molecular analysis in the current trial and for future use in ancillary studies, if applicable <b>II186ff</b>                                                                                                          |
| 29 |                               |     |                                                                                                                                                                                                                                                                                                                        |
| 30 |                               |     |                                                                                                                                                                                                                                                                                                                        |
| 31 |                               |     |                                                                                                                                                                                                                                                                                                                        |

32 \*It is strongly recommended that this checklist be read in conjunction with the SPIRIT 2013  
 33 Explanation & Elaboration for important clarification on the items. Amendments to the  
 34 protocol should be tracked and dated. The SPIRIT checklist is copyrighted by the SPIRIT  
 35 Group under the Creative Commons "[Attribution-NonCommercial-NoDerivs 3.0 Unported](https://creativecommons.org/licenses/by-nc-nd/3.0/)"  
 36 license.  
 37  
 38  
 39  
 40  
 41  
 42  
 43  
 44  
 45  
 46  
 47  
 48  
 49  
 50  
 51  
 52  
 53  
 54  
 55  
 56  
 57  
 58  
 59  
 60

# BMJ Open

## Randomised multi-centre effectiveness trial of rapid syndromic testing by panel assay in children presenting to European emergency departments with acute respiratory infections – trial protocol for the ADEQUATE Paediatric trial

|                                 |                                                                                                                                                                                                                                                                                                                                     |
|---------------------------------|-------------------------------------------------------------------------------------------------------------------------------------------------------------------------------------------------------------------------------------------------------------------------------------------------------------------------------------|
| Journal:                        | <i>BMJ Open</i>                                                                                                                                                                                                                                                                                                                     |
| Manuscript ID                   | bmjopen-2023-076338.R1                                                                                                                                                                                                                                                                                                              |
| Article Type:                   | Protocol                                                                                                                                                                                                                                                                                                                            |
| Date Submitted by the Author:   | 14-Dec-2023                                                                                                                                                                                                                                                                                                                         |
| Complete List of Authors:       | ADEQUATE Paediatric Trial Group, ADEQUATE Paediatric Trial Group; Fondazione Penta ONLUS Kohns Vasconcelos, Malte; St George's University of London, Antimicrobial Resistance Research Group, Centre for Neonatal and Paediatric Infection; Universitätsklinikum Hamburg-Eppendorf, Institute for Medical Biometry and Epidemiology |
| <b>Primary Subject Heading</b>: | Emergency medicine                                                                                                                                                                                                                                                                                                                  |
| Secondary Subject Heading:      | Paediatrics, Respiratory medicine, Infectious diseases                                                                                                                                                                                                                                                                              |
| Keywords:                       | Respiratory infections < THORACIC MEDICINE, ACCIDENT & EMERGENCY MEDICINE, Paediatric A&E and ambulatory care < PAEDIATRICS, INFECTIOUS DISEASES                                                                                                                                                                                    |
|                                 |                                                                                                                                                                                                                                                                                                                                     |

SCHOLARONE™  
Manuscripts

1 **Randomised multi-centre effectiveness trial of rapid syndromic testing by panel assay in children**  
2 **presenting to European emergency departments with acute respiratory infections – trial protocol for the**  
3 **ADEQUATE Paediatric trial**

4  
5 ADEQUATE Paediatric Trial Group  
6  
7  
8  
9

10 Keywords:

11  
12 pragmatic trial, acute respiratory infection, syndromic testing, multiplex PCR, point-of-care testing  
13  
14  
15  
16  
17  
18  
19  
20  
21  
22  
23  
24  
25  
26  
27  
28  
29  
30  
31  
32  
33  
34  
35  
36  
37  
38  
39  
40  
41  
42  
43  
44  
45

46 Correspondence:

47  
48 Malte Kohns Vasconcelos  
49

50 Antimicrobial Resistance Research Group, Centre for Neonatal and Paediatric Infection

51 St. George's, University of London

52 Cranmer Terrace

53  
54 London, SE17 ORE

55  
56 United Kingdom

57  
58 Email: mkohns@sgul.ac.uk  
59  
60



**ABSTRACT**

**Introduction:** Syndromic panel assays, i.e. using one test to simultaneously target multiple pathogens with overlapping signs and symptoms, have been integrated into routine paediatric care over the past decade, mainly for more severely ill and hospitalised patients. Their wider availability and short turnaround times open the possibility to apply them to non-hospitalised patients as well. In this context, it is important to trial how clinicians make use of pathogen detection data and if their early availability influences management decisions, particularly antibiotic use and hospitalisation.

**Methods and analysis:** ADEQUATE is an individually-randomised, controlled, open-label effectiveness trial comparing the impact of a respiratory pathogen panel assay (BIOFIRE® Respiratory Panel 2.1*plus*) used as a rapid syndromic test on nasopharyngeal swabs in addition to the standard of care versus standard of care alone. The trial will 1:1 randomise 520 participants under the age of 18 at 9 paediatric emergency departments in 6 European countries. Inclusion criteria for the trial consist of two sets, with the first describing respiratory tract infections in paediatric patients and the second describing the situation of potential management uncertainty in which test results may immediately affect management decisions. Enrolment started in July 2021 and is expected to be complete in early 2024. We will perform a two-sample t-test assuming a pooled variance estimate to compare the log transformed mean time on antibiotic treatment (in hours) and number of days alive out of the hospital within 14 days after study enrolment between the control and intervention arms.

**Ethics and dissemination:** The trial protocol and materials were approved by research ethics committees in all participating countries. The respiratory pathogen panel assay is CE marked and FDA cleared for diagnostic use. Participants and caregivers provide informed consent prior to study procedures commencing. The trial results will be published in peer-reviewed journals and at national and international conferences. Key messages will also be disseminated via press and social media where appropriate.

**Trial registration number:** NCT04781530

1 27 **Strengths and limitations of this study (max 5 bullet points):**

2

3

4 28 - The eligibility criteria in this trial are tailored to include a patient population where decisions are

5

6 29 pending and test results may impact initial management decisions.

7

8 30 - The trial's setting spans European countries with some difference in available resources and the

9

10 31 results will therefore likely be generalisable to other high-income country settings.

11

12 32 - The panel assay used in the trial is assessed as a test close to the point of care in the emergency

13

14 33 department and use of the test in other scenarios may result in different estimates for

15

16 34 effectiveness.

17

18 35 - Due to the pragmatic design with minimised interference with routine procedures and clinician

19

20 36 judgement, results may lose applicability with major changes in the respective health system.

21

22

23 37 -

24

25

26

27

28

29

30

31

32

33

34

35

36

37

38

39

40

41

42

43

44

45

46

47

48

49

50

51

52

53

54

55

56

57

58

59

60

## 38 INTRODUCTION

39 Community-acquired acute respiratory infections (ARI) are the most frequent reason for unscheduled  
40 healthcare visits and at the same time, the most frequent cause of inappropriate antibiotic use.[1, 2] While  
41 most ARI cause mild symptoms and are self-limiting, lower respiratory tract infections, including  
42 pneumonia, globally cause more than half a million deaths in <5 year old children per year.[3] Especially  
43 since the wide roll-out of conjugate vaccines, most of these infections in children do not require treatment  
44 with antibiotics. Antibiotic consumption is a driver of development of antimicrobial resistance (AMR) and  
45 where use of antibiotics in the individual is not warranted, the ecological and economic cost of  
46 antimicrobial resistance per antibiotic consumed is considerable.[4-6]

47 Determining which pathogen is the likely cause of an infectious episode is one common approach for  
48 clinicians to decide on the probability of antibiotic treatment being beneficial in a patient. In paediatric  
49 routine care, pathogen testing is usually limited to upper respiratory tract (URT) samples.[7] A wide range  
50 of common respiratory pathogens that may cause more severe disease are frequently present in the URT of  
51 asymptomatic children as well, thereby making it more difficult to determine the causative pathogen of an  
52 episode.[8] While for some viral pathogens, especially RSV, influenza virus, parainfluenza virus and human  
53 metapneumovirus, there is a high probability that their detection explains the cause of an episode of  
54 severe ARI, for others, including *Streptococcus pneumoniae* and human rhinovirus, the association is much  
55 weaker.[9] Detection of a viral pathogen does not exclude a bacterial aetiology of an illness episode and  
56 uncertainty of aetiology may increase the probability of antibiotic prescriptions.[10]

57 Children hospitalised for ARI stay in hospital for a median of 2 to 3 days and resolution of symptoms takes  
58 much longer.[3, 11] Interventions reducing hospital stays have a high potential to reduce psycho-social  
59 costs for families and economic costs for the health system.

60 Syndromic panel assays, i.e. using one test to simultaneously target multiple pathogens with overlapping  
61 signs and symptoms, have been integrated into routine paediatric care including in emergency  
62 departments over the past decade, mainly for more severely ill and hospitalised patients. Their wider  
63 availability and short turnaround times open the possibility to apply them to non-hospitalised patients as

1 64 well. In this context, it is important to trial how clinicians make use of pathogen detection data and if their  
2  
3 65 early availability influences management decisions.  
4  
5

6 66 VALUE-Dx is the first Innovative Medicines Initiative project initiated by six in vitro diagnostic companies  
7  
8 67 who joined forces with 20 non-industry partners to combat AMR and improve patient outcomes. The  
9  
10 68 multidisciplinary consortium involves clinicians, microbiologists, health economists, social scientists, and  
11  
12 69 industry. The trial described here is a part of this VALUE-Dx project. It aims to determine if the integration  
13  
14  
15 70 of a rapid syndromic test at an early point in time in the management workflow in paediatric emergency  
16  
17 71 departments can influence the decisions to treat a patient with antibiotics or to hospitalise them.  
18  
19  
20  
21  
22  
23  
24  
25  
26  
27  
28  
29  
30  
31  
32  
33  
34  
35  
36  
37  
38  
39  
40  
41  
42  
43  
44  
45  
46  
47  
48  
49  
50  
51  
52  
53  
54  
55  
56  
57  
58  
59  
60

## 72 METHODS AND ANALYSIS

73 ADEQUATE is an individually randomised, controlled, open-label superiority effectiveness trial comparing  
74 the impact of a respiratory pathogen panel assay used as a rapid syndromic test in addition to the standard  
75 of care versus standard of care alone on antibiotic use and hospitalisations in paediatric patients with ARI  
76 presenting to EDs. The trial is part of workpackage 4 of the VALUE-Dx consortium.

### 77 Trial setting

78 The trial enrolls participants at 7 paediatric EDs in 5 European countries (Germany, Greece, Spain,  
79 Switzerland and the United Kingdom). Enrolment started in July 2021 (trial start date: 1<sup>st</sup> July 2021) and is  
80 expected to be complete in early 2024 (planned end date – last patient last visit: 31<sup>st</sup> March 2024).

### 81 Trial population

82 Inclusion criteria for the trial consist of two sets, with the first describing respiratory tract infections in  
83 paediatric patients and the second describing the situation of potential management uncertainty in which  
84 test results may immediately affect management decisions. Few exclusion criteria were introduced to  
85 increase generalisability of the trial results. The full eligibility criteria are listed in table 1.

| <i>Inclusion criteria (all must be fulfilled)</i>                                                                                                                                                                                                                                                                                                                                                                                                                                                                                                                                                                                                                                                                                                                                                         |
|-----------------------------------------------------------------------------------------------------------------------------------------------------------------------------------------------------------------------------------------------------------------------------------------------------------------------------------------------------------------------------------------------------------------------------------------------------------------------------------------------------------------------------------------------------------------------------------------------------------------------------------------------------------------------------------------------------------------------------------------------------------------------------------------------------------|
| <p>1. ARI presentation<br/>Children of any age presenting to the ED with an acute illness (present for 14 days or less) with temperature <math>\geq 38.0^{\circ}\text{C}</math> measured at presentation or parental report of fever within the previous 72 hours AND at least two of the below:</p> <ul style="list-style-type: none"> <li>• Cough</li> <li>• Abnormal sounds on chest auscultation (crackles, reduced breath sounds, bronchial breathing, wheezing)</li> <li>• Clinical signs of dyspnea (chest indrawing, nasal flaring, grunting)</li> <li>• Signs of respiratory dysfunction: tachypnoea for age (as per hospital standard) or decreased oxygen saturation (&lt;92% in room air)</li> <li>• Signs of reduced general state: poor feeding, vomiting or lethargy/drowsiness</li> </ul> |
| <p>2. Management uncertainty<br/>At time of screening</p> <ul style="list-style-type: none"> <li>• Patient has undergone first assessment by managing clinical team (doctor or nurse, incl. triage)</li> <li>• Hospitalisation is not yet determined, i.e., neither by clinical presentation definitely requiring hospitalisation (e.g., per local guideline) nor by fixed decision of managing clinical team; admission to a short-stay unit or surveillance unit is not considered a hospitalisation for this trial</li> <li>• Antibiotic treatment or hospitalisation is being considered by the managing team</li> <li>• The rapid syndromic diagnostic test result can be awaited up to 4 hours before the decision to discharge the patient or to initiate antibiotic treatment is made</li> </ul>  |
| <i>Exclusion criteria (none may be fulfilled)</i>                                                                                                                                                                                                                                                                                                                                                                                                                                                                                                                                                                                                                                                                                                                                                         |
| <p>1. Development of acute respiratory infection more than 48 hours after hospital admission (hospital acquired);</p>                                                                                                                                                                                                                                                                                                                                                                                                                                                                                                                                                                                                                                                                                     |

2. Patients with a severe underlying medical condition dictating management decisions including hospitalisation and/or antibiotic treatment (e.g., cystic fibrosis, immunosuppression);
3. Hospitalisation for at least 24 hours within the last 14 days (healthcare-associated);
4. Confirmed pregnancy or breastfeeding;
5. Any clinically significant abnormality identified at the time of screening that in the judgment of the Investigator would preclude safe completion of the study or constrain endpoints assessment such as major systemic diseases or patients with short life expectancy;
6. Inability to obtain informed consent;
7. Alternative noninfectious diagnosis that explains clinical symptoms.

86 Table 1: Eligibility criteria

## 87 **Screening, recruitment and consent**

88 During working hours of study staff, patients in the emergency department or short-stay unit are screened  
89 for eligibility by study staff. In most instances, screening takes place as soon as possible after initial triage  
90 but screening at any later stage within the emergency department was possible. Informed consent is  
91 sought from all patients meeting the eligibility criteria at the time of screening. The health status of  
92 patients might rapidly deteriorate between screening and randomisation. Therefore, all eligibility criteria  
93 are be re-evaluated and confirmed by trained and delegated trial staff prior to the decision to randomise  
94 the patient.

95 Screening failures are defined as patients who were found eligible per screening but have either not given  
96 informed consent, or have deteriorated between screening and randomisation, and therefore no longer  
97 fulfil eligibility criteria. Screening failures are recorded anonymously on a screening log detailing the reason  
98 for screening failure and are not randomised. No diagnostic procedures are performed for the purpose of  
99 checking eligibility criteria specifically, i.e., any procedures indicated for the standard of care patient  
100 management will be performed but none will be added to check eligibility criteria.

## 101 **Randomisation and blinding**

102 Participants are randomised with equal probability into two allocation groups: (a) the control group,  
103 receiving the current standard of care at the respective trial site, which may include rapid diagnostic testing  
104 for specific pathogens or syndromic testing with results reported after a longer time than four hours, or (b)  
105 the intervention group, receiving the standard of care plus immediately a nasopharyngeal swab tested with  
106 the BIOFIRE® Respiratory Panel 2.1*plus* (RP2.1*plus*). The intervention is a multiplexed nucleic acid test for  
107 the simultaneous qualitative detection and identification of multiple respiratory viral and bacterial nucleic

1 108 acids in nasopharyngeal swabs obtained from patients suspected of respiratory tract infections. The assay is  
2  
3 109 licensed in CE marked and FDA cleared, for the use intended in this trial. The pathogens included in the  
4  
5 110 assay are adenovirus, coronaviruses (229 E, HKU1, NL63, OC43, SARS-CoV-2), human metapneumovirus,  
6  
7 111 human rhinovirus/enterovirus, influenza A, including subtypes H1, H1-2009, and H3, influenza B, middle  
8  
9  
10 112 east respiratory syndrome coronavirus (MERS-CoV), parainfluenza virus (1, 2, 3, 4), respiratory syncytial  
11  
12 113 virus, *Bordetella parapertussis*, *Bordetella pertussis*, *Chlamydia pneumoniae* and *Mycoplasma pneumoniae*.

13  
14  
15 114 After all eligibility criteria have been verified and informed consent has been obtained, randomisation is  
16  
17 115 performed using the built-in randomisation module of the electronic Case Report Form system (Research  
18  
19 116 Online). Allocation is concealed until the moment of randomisation. To this end, block randomisation is  
20  
21  
22 117 used with variable blocks of size 2, 4 and 6. Randomisation is stratified by centre. In the intervention group,  
23  
24 118 a URT swab is obtained by trained trial or clinical staff and submitted to the panel assay test with as little  
25  
26 119 delay as possible. After the decision to randomise the subject is made, subjects will not be excluded from  
27  
28 120 the trial. Due to the nature of the intervention, blinding is not possible. If the allocated intervention is not  
29  
30  
31 121 applied for any reason, this will be recorded and follow-up for the participant will be completed.

### 32 33 122 **Outcome measures and assessments**

34  
35  
36 123 The co-primary study endpoints are:

- 37  
38  
39 124 1. Days alive out of hospital within 14 days after study enrolment  
40  
41  
42 125 2. Days on Therapy (DOT) with antibiotics within 14 days after study enrolment  
43  
44  
45 126 14 days were selected over 30 days as time window for the primary endpoints because a potential superior  
46  
47 127 effect would be expected to be more immediate, and a shorter window resulted in a small gain in power.  
48  
49  
50 128 Furthermore, delayed effects will still be captured in the secondary endpoints.

51  
52 129 The secondary endpoints are listed in table 2.

#### 53 54 55 Non-inferiority safety endpoint:

- 56  
57  
58 • For initially hospitalised patients: i) any readmission, ii) ICU admission => 24 hours after  
59 hospitalisation, or iii) death, within 30 days after study enrolment  
60

- For initially non-admitted patients: any admission or death within 30 days after study enrolment.

Direct costs and indirect costs within 30 days after enrolment, specifically cost of healthcare within 30 days after enrolment, including hospital and ICU days, utilisation of non-hospital services and cost of anti-infective and concomitant medication, and cost of workdays lost within 30 days, including days for childcare

Change in quality of life as determined by EQ-5D-5L (or suitable alternative for age), days away from usual childcare routine or school and healthcare utilisation on day 1, 14, and 30 after enrolment.

Proportion of participants with an identified respiratory pathogen in both study groups on randomisation day samples.

Proportion of participants on non-first-line anti-infective regimens (as defined by local guidelines)

Time to de-escalation and time to stop of anti-infective therapy

Proportion of hospitalised participants with detection of cephalosporin-, carbapenem- or quinolone-resistant Enterobacteriaceae on any standard of care samples >7 days after randomisation

Hours in individual or cohort isolation in hospitalised participants

Table 2: Secondary endpoints

Primary endpoints were adapted after a decision to terminate the recruitment of adult patients on a partner protocol on 3rd May 2022. The adult partner trial was terminated mainly because of slow recruitment and because of management workflows for patients having changed during the Covid-19 pandemic in ways that additionally impeded patient inclusions. Prior to this adaptation, the non-inferiority safety endpoint was considered a third co-primary endpoint. Because mortality in the study population in high-resource settings is extremely low, and secondary admission rates among children initially managed in the community as well as re-admission and secondary ICU admission rates among primarily admitted children are likely to be in the range of below 5%, this endpoint was judged to unlikely be relevant or appropriate for the paediatric population. Additionally, secondary admissions will still provide safety information on the first co-primary endpoint.

Participants are followed up until 30 days after randomisation. Standard of care clinical and microbiological data are collected. The participant data set summarises the illness episode and outcome, microbiological testing, antimicrobial use, use of healthcare facilities including hospitalisations and return to normal



activity, childcare arrangements and quality of life. Data is entered into case report forms in a GCP-compliant database held at the Julius Center, UMC Utrecht. Follow-up information including data for health economic analysis is collected on day 14 (visit window: day 12 – 16) and on day 30 (visit window: day 28 – 32) after randomisation. Parents or participants themselves (where age-appropriate) are contacted by study staff for the follow-up visits, usually via telephone but in case of hospitalisation or hospital attendance during the visit window face-to-face visits are acceptable. Quality of life is measured by EQ-5D, using age-appropriate versions including proxy versions that are emailed to families. In case of failure to successfully contact families at the end of trial participation, the participant's general practitioner is contacted to complete information on the primary endpoints.

### Sample size and power

A reduction of one day in antibiotic treatment or increase of one day in days alive out of hospital were chosen for a clinically relevant reduction in antibiotic prescribing and a reduction in hospital costs, respectively. In children, the co-primary superiority endpoints are likely to be dominated by the DOT with antibiotics, as ambulatory exposure to antibiotics is likely to be common in the absence of hospital admission, whereas many admitted children would be expected to be treated with antibiotics as well.

The sample size estimation was performed for this endpoint. From a recent publication on variations in antibiotic prescribing in febrile children presenting to European EDs, the standard deviation for days on antibiotic treatment was estimated as 3.7 days. Based on this, recruitment of 170 children per arm (total of 340 children) will be sufficient to detect a difference of one day in this endpoint (power 80%, alpha 0.05).

To account for uncertainty about the variability in both co-primary endpoints in the paediatric study population, we adopt a highly conservative approach aiming to recruit 252 evaluable children per arm (total of 504 children), resulting in adequate power to detect a difference in one day in both endpoints (table 3), with the calculations performed for the "antibiotic prescribing" endpoint

| SD  | Delta | Alpha | Beta | Correction | Sample size per arm |
|-----|-------|-------|------|------------|---------------------|
| 2.5 | 1     | 0.025 | 0.2  | 1          | 99                  |
| 3.0 | 1     | 0.025 | 0.2  | 1          | 142                 |
| 3.5 | 1     | 0.025 | 0.2  | 1          | 193                 |

|   |     |   |       |     |   |     |
|---|-----|---|-------|-----|---|-----|
| 1 | 3.7 | 1 | 0.025 | 0.2 | 1 | 215 |
| 2 |     |   |       |     |   |     |
| 3 | 4.0 | 1 | 0.025 | 0.2 | 1 | 252 |
| 4 | 4.5 | 1 | 0.025 | 0.2 | 1 | 318 |
| 5 |     |   |       |     |   |     |
| 6 | 5.0 | 1 | 0.025 | 0.2 | 1 | 393 |
| 7 |     |   |       |     |   |     |

8 167 Table 3: Sample sizes for Days on antibiotic treatment (paediatric) using different assumptions

9

10

11 168 **Analysis plan**

12

13

14 169 The analysis will be performed by the trial statistician using the R language and environment for statistical  
15 computing (version 3.6 or higher). Reporting will follow the CONSORT guidelines.

16 170

17

18 Both co-primary endpoints will be tested separately, and superiority is confirmed if either one or both are  
19 171 superior in terms of the primary analysis.

20

21 172

22

23 To investigate differences between the two arms for each endpoint separately, a two-sample t-test of the  
24 173 log transformed mean time (in hours) on antibiotic treatment or alive out of hospital comparing those on  
25 the standard of care arm (control) and the intervention arm will be performed, assuming a pooled variance  
26 174 estimate.

27

28

29 175 An adjusted linear mixed effects model will be fitted with log transformed days on antibiotic treatment or  
30 days alive out of hospital as dependent variable, and an indicator variable for the randomised arm, age  
31 176 groups (<5y, 5-17y) and comorbidities (stratified according to modified Charlson comorbidity index: 0, 1,  
32 +1) as independent variables. Further independent variables will be considered in post hoc analyses. The  
33 177 model will include a random intercept for each country (and potentially, emergency department in country  
34 if cluster sizes allow), accounting for clustering on these variables. Zero-inflated or similar models will be  
35 considered if data are heavily skewed.

36

37

38 178 We anticipate days alive out of hospital data to be heavily right skewed in the full analysis set, and  
39 therefore suitable transformations or modelling approaches will be considered as appropriate.

40

41

42 182 Subgroup analyses of the primary endpoints will include

43

44

45 183 • by age groups (<5, >5)

46

47 184 • by admission at baseline (yes/no)

48

49 185 • by receipt of antibiotics at baseline (yes/no)

50

- 1 190 • for those on antibiotic therapy at baseline, we will dichotomise days on treatment into two groups  
2  
3 191 (0="1-5 days", 1=">5 days"), and fit a (mixed effects) logistic model with this grouping as  
4  
5 192 dependent variable, adjusting as above.  
6  
7  
8 193 • by country  
9  
10 194 • by emergency department (if the number of patients allows).  
11  
12

13 195 A detailed analysis plan for all secondary objectives will be finalised before the trial's database closure and  
14  
15 196 will be under version control at the Paediatric Research Centre, University of Basel Children's Hospital.  
16  
17

### 18 197 **Sub-study and biobanking**

19  
20  
21 198 The sub-study will have its own analysis plan which will be finalised before the respective database is  
22  
23 199 locked.  
24

25 200 The aim of the microbiology study, located at the University of Antwerp, is to use suitable methods,  
26  
27 201 including metagenomic sequencing, to characterise changes in microbiological colonisation and  
28  
29 202 antimicrobial resistance patterns dependent on treatment with antibiotics. In a subset of study sites and  
30  
31 203 participants (up to 150 participants), additional oropharyngeal samples are obtained from participants. One  
32  
33 204 sample is obtained on the day of randomisation and one sample on day 30 (visit window: day 28 – 32) after  
34  
35 205 randomisation. Specific procedures for collection and processing are provided to sites. After receiving  
36  
37 206 specific instructions, the day 30 swab can be obtained at home and sent to the local study site via mail.  
38  
39

40  
41 207 Inclusion in the microbiology study will require separate informed consent.  
42  
43

44 208 Biological samples obtained for the study (including leftovers from the specimens obtained for the  
45  
46 209 intervention and for the microbiology study) are be stored at all sites and shipped to the University of  
47  
48 210 Antwerp for inclusion in a biobank, subject to the condition that separate informed consent for biobanking  
49  
50 211 is given.  
51  
52

53 212 Participation in the main study does not depend on consent for the microbiology study or for biobanking.  
54  
55

### 56 213 **Monitoring**

57  
58  
59 214 Representatives of the trial management team and a designated study monitor conducted a remote site  
60  
215 initiation visit at each study site to verify qualifications of the local investigators and inform the local teams

1 216 of responsibilities and the procedures for ensuring adequate and correct documentation and use of the  
2  
3 217 electronic data capture system as well as providing training on implementing all trial activities.  
4  
5  
6 218 Sites are requested to enter data in the eCRF within 5 working days following each subject's visit. The  
7  
8 219 monitor ensures that data is entered in a timely manner. When queries regarding the data entered in the  
9  
10 220 eCRF are raised, the site is expected to resolve them within 10 working days.  
11  
12  
13 221 The monitor visits a site at least once during the course of the study, when at least 3 subjects are  
14  
15 222 randomised and completed data collection in the eCRF up to at least Day 30. Depending on the subject  
16  
17 223 enrollment rate and any site-specific issues, the total number of on-site monitoring visits may be increased.  
18  
19  
20 224 The visits include Source Data Verification (SDV) for selected variables: 100% SDV is performed on all  
21  
22 225 Informed Consent Form (ICF) versions and consent process in the source; a total of 10% of subjects (always  
23  
24 226 including the first 3 randomised subjects, thereafter randomly selected) have SDV performed on the  
25  
26 227 primary and secondary endpoint CRFs. 100% serious adverse events (S)AEs, serious adverse device effects  
27  
28 228 (S)ADEs and device deficiencies (DD) that are reported in accordance with the study protocol, including  
29  
30 229 potential unreported events for these subjects reviewed.  
31  
32  
33  
34 230 In accordance with ICH GCP guidelines,[12] audits may be performed by the ethics committees and  
35  
36 231 competent authorities during the course of the study.  
37  
38  
39  
40 232

## ETHICS AND DISSEMINATION

### Ethical and regulatory compliance

Prior to study conduct, the protocol, proposed patient information, consent form and other study-specific documents were approved by all local ethics committees, with the first approval received in Switzerland in June 2021 (Ethikkommission Nordwest- und Zentralschweiz (2021-00713)). The current protocol version is 4.0, approved between October 2022 and March 2023 for the respective trial sites. Changes compared to the first version are mainly concerned with the primary endpoint as explained above and do not include changes in the trial conduct. The trial is sponsored by the Penta Foundation, Corso Stati Uniti, 4, 35127 Padova, Italy. The industry partner bioMérieux supplied equipment, consumables and logistical support for the trial.

Before commencement of the trial, a risk classification following the ISO 201916 standard and ICH-GCP E6 guidelines was carried out. The risk classification of the ADEQUATE Study is defined as negligible, because participation in the intervention group has no significant additional risks compared to the standard of care.

This study is registered on <https://clinicaltrials.gov> (NCT04781530) since 1st March 2021

The study is carried out according to the protocol and with principles enunciated in the current version of the Declaration of Helsinki,[13] the guidelines of Good Clinical Practice (GCP) issued by ICH,[12] in case of medical device: the European Directive on medical devices 93/42/EEC and the ISO Norm 14155,[14].

### Patient and Public Involvement

This protocol was written without patient involvement. Patients or guardians were not invited to comment on the study design or to contribute to the writing or editing of this document for readability or accuracy.

### Dissemination of results

The data from all centres will be analysed together and published as soon as possible in peer-reviewed journals, as well as being presented at national or international conferences.

1 258 The results of this trial will be submitted for Open Access publication in high impact peer-reviewed journals  
2  
3 259 likely to be read by health professionals in the management of ARI in children in Europe. The work will be  
4  
5 260 presented at key medical conferences. To maximise the impact of the trial across Europe, its findings will be  
6  
7 261 disseminated more widely through abstracts for oral and poster presentations submitted to some of the  
8  
9  
10 262 main relevant national and international conferences.

11  
12  
13 263 Findings will further be distributed through activities of the VALUE-Dx consortium's workpackage 6,  
14  
15 264 including press releases, the consortium website and educational activities and materials. The social media  
16  
17 265 presence of the organisations involved will also be used to highlight news about the trial.

18  
19  
20 266 Datasets generated from the trial will be made accessible in line with regulatory requirements on request  
21  
22 267 to the trial consortium through the corresponding author.

**TRIAL STATUS AND DISCUSSION**

Currently, 421 children have been enrolled in the trial. Follow-up has been completed for 388 and 22 have missed the 14d and 28d follow-up visit, but data on primary endpoints may still be completed following GP enquiry. Recruitment accrual is at 80% of target.

Following strictly pragmatic trial design decisions, the trial will have limited ability to elucidate the potential mechanism that enables the test to be effective, or prevents it from being effective. For example, the protocol does not provide guidance on interpretation of test results. Clinicians' perceptions about the positive and negative predictive values of the test results for any specific aetiology are therefore not controlled in our trial. In clinical practice, these may change with longer-term trends of changing incidences of pathogens and the trial results may potentially be less applicable under these circumstances. On balance, we believe that this is outweighed by the gain in external validity that a pragmatic trial offers, namely that we expect the trial results to be broadly generalisable because we aimed to reduce introduction of selection bias.

The trial assesses the effectiveness of the diagnostic test in a specific setting, namely used close to the point of care in the emergency department. Patients in the trial's control group may have received the same or similar tests as long as results were only received after more than four hours. The effectiveness of the test may therefore be lower compared to a scenario in which the test was only compared to patients with no respiratory panel assay data available.

A limitation of the rapid syndromic test used is that it does not cover *S. pneumoniae* or other bacteria considered typical causes of acute lower respiratory tract infection. The trial does not offer any insight into whether such an assay might be effective in the same setting.

A 2014 Cochrane Review found a trend towards reduced antibiotic use with use of rapid syndromic tests in paediatric EDs.[15] Since then, two single-centre randomised controlled trials (RCT), one from Finland and one from the US, found no effect of a similar test as used in our trial on antibiotic prescribing in EDs.[16, 17]

Both trials employed a similar strategy of approaching children at an early point in time and before clinical assessment. Our trial differs in that children were not eligible if decisions on their hospitalisation had already been made, including through a fixed treatment guideline or standard operating procedure.

Additionally, children were excluded when it was deemed obvious from the start by clinicians that neither

1 296 antibiotics nor hospitalisation were considered. Also, both trials did not investigate duration of antibiotics,  
2  
3 297 thereby potentially missing an effect on antibiotic use if results from the test would make clinicians more  
4  
5 298 likely to stop antibiotics early. Finally, both trials were designed to show a difference in antibiotic  
6  
7 299 prescribing but did not complement this with decisions to hospitalise patients. Thus, our trial adds to the  
8  
9  
10 300 previous literature

- 11  
12 301 - by employing the same protocol across a range of different settings,
- 13  
14 302 - by studying the intervention in a population in which clinicians express an initial degree of  
15  
16 303 uncertainty about management,
- 17  
18 304 - by treating hospitalisation and its duration as equally important effects of a rapid syndromic test as  
19  
20  
21 305 treatment with antibiotics,
- 22  
23 306 - and by capturing delayed effects of the test on both

24  
25 307 The trial's primary endpoint was adapted after the start of the trial. Although this is often considered  
26  
27 308 acceptable, it is still a decision that needs careful deliberation and explanation. The ADEQUATE trial was  
28  
29  
30 309 initially designed as two partner trials in EDs, one in the adult and one in the paediatric population. The  
31  
32 310 primary outcomes were planned to be analysed together, thus a safety non-inferiority endpoint with high  
33  
34 311 relevance mainly for the adult population was introduced into the primary endpoints. Because of the low  
35  
36 312 risk of meeting this endpoint, demonstrating non-inferiority was dominating the sample size estimation for  
37  
38  
39 313 the paediatric trial. Following the obligation to restrict the number of individuals in clinical trials to the  
40  
41 314 number necessary to generate robust findings, we decided to move the non-inferiority endpoint to the  
42  
43 315 secondary endpoints as soon as the adult trial was terminated due to changes in routine care making the  
44  
45 316 trial unfeasible.

46  
47  
48 317 Paediatric ARI is a common condition with diverse aetiology. A diagnostic intervention reducing length of  
49  
50 318 hospital stay and antibiotics has a high potential to (a) reduce strain on healthcare resources, (b) reduce  
51  
52  
53 319 evolution of antimicrobial resistance and (c) improve children's and parents' well-being. The ADEQUATE  
54  
55 320 trial will provide conclusive evidence on the effectiveness of a rapid syndromic test for this purpose.  
56  
57

58 321  
59  
60



**STATEMENTS****A. contributorship statement**

Members of the ADEQUATE Paediatric Trial Group contributed in the following roles:

Conceptualisation: Cristina Prat Aymerich, Malte Kohns Vasconcelos, Andrew Atkinson, Henri van

Werkhoven, Surbhi Malhotra-Kumar, Herman Goossens, Marc Bonten, Julia A. Bielicki

Data curation: Elia Vitale, Emma Gardiner, Lisa Capozzi, Maggie Nyirenda Nyang'wa, Argyro Ftergioti, Maria

Kitsou, Manuel Gijón, Maike Seyfried, Hanna Renk, Louisa Brock, Cecilia Hultin

Funding acquisition: Herman Goossens, Maarten J. Postma, Fernando Antonanzas

Investigation: Malte Kohns Vasconcelos, Anthony Hemeson, Alexander Ross, Maggie Nyirenda Nyang'wa,

Maria Simitsopoulou, Kalliopi Pantzartzi, Kostas Zarras, Argyro Ftergioti, Maria Kitsou, Manuel Gijón, Rosa

Calderón, Fátima Machín, Laura Cabello, Andrea Seoane, Sofía Mesa, Lidia Oviedo, Luisa Barón, Ann-Kathrin

Stiegler, Carmen Junk, Kristina Kiesel, Maren Belschner, Maike Seyfried, Louisa Brock, Louise F Hill, Rahel

Berger, Leon Pfeiffer, Emanuela Früh, Elena Robinson, Andrea Marten, Leen Timbermont, Juan Pablo

Rodriguez Ruiz, Simon van der Pol, Pim van Dorst, Thea van Asselt, Fernando Antonanzas, Marino Gonzales,

Paula Rojas

Methodology: Andrew Atkinson, Henri van Werkhoven, Cristina Prat Aymerich, Malte Kohns Vasconcelos,

Leen Timbermont, Juan Pablo Rodriguez Ruiz, Surbhi Malhotra-Kumar, Maarten J. Postma, Herman

Goossens, Marc Bonten, Julia A. Bielicki

Project administration: Giulio Vecchia, Elia Vitale, Federica D'Ambrosio, Wietske Bouwman, Marjolein van

Esschoten, Alessia Severi Conti, Giulia Brigadoi, Cecilia Liberati, Maria Kitsou, Manuel Gijón, Pablo Rojo,

Maike Seyfried, Kristina Schmauder, Silke Peter, Hanna Renk, Louisa Brock, Cecilia Hultin, Louise F Hill,

Claudia Werner, Frank Leus, David de Pooter, Leen Timbermont, Juan Pablo Rodriguez Ruiz, Benjamin

Hommel, Marie Tessonneau, Yasmine Yau

Formal analysis: Simon van der Pol, Pim van Dorst, Thea van Asselt, Fernando Antonanzas, Marino

Gonzales, Paula Rojas

1 347 Software: Simon van der Pol, Pim van Dorst

2

3

4 348 Resources: Florence Allantaz, Maggie Nyirenda Nyang'wa, Gianluca Gualco, Federica Vanoni, Aristeia

5

6 349 Karypiadou, Charis Lampada, Konstantina Charisi, Parthena Savvidou, Olga Tsiatsiou, Elsa Chorafa, Elisavet

7

8 Michailidou, Manuel Gijón, Fátima Machín, Irene Hernández, Tobias Walter, Dominic Imort, Fabian Behret,

9

10 351 Philippe Cleuziat

11

12

13

14 352 Supervision: Dalia Dawoud, Claire Hawksworth, Anthony Hemeson, Maggie Nyirenda Nyang'wa, Emmanuel

15

16 353 Roilides, Elias Iosifidis, Manuel Gijón, Pablo Rojo, Silke Peter, Hanna Renk, Cristina Prat Aymerich, Jean-

17

18 354 Louis Tissier, Florence Allantaz, Philippe Cleuziat, Maarten J. Postma, Herman Goossens, Marc Bonten, Julia

19

20 355 A. Bielicki

21

22

23

24 356 Writing – original draft: Malte Kohns Vasconcelos, Cristina Prat Aymerich, Henri van Werkhoven, Marc

25

26 357 Bonten, Julia A. Bielicki

27

28

29

30 358 Writing – review & editing: all authors

31

32

33 359

34

35

36

37

38

39

40

41

42

43

44

45

46

47

48

49

50

51

52

53

54

55

56

57

58

59

60

372

## 360 **B. competing interests**

361 Benjamin Hommel, Marie Tessonneau, Sophie Vandepitte, Jean-Louis Tissier, Florence Allantaz and Philippe

362 Cleuziat are employees of bioMérieux, the manufacturer of the diagnostic tool under study in this trial.

363 They were involved in the administration of the trial, provided resources and monitored the trial progress.

364 They were not involved in the design or analysis of the trial. The other authors have no potential conflict of

365 interest to disclose.

## 367 **C. funding**

368 This project has received funding from the Innovative Medicines Initiative 2 Joint Undertaking under grant

369 agreement No 820755. This Joint Undertaking receives support from the European Union's Horizon 2020

370 research and innovation programme and EFPIA and bioMérieux SA, Janssen Pharmaceutica NV, Accelerate

371 Diagnostics S.L., Abbott, Bio-Rad Laboratories, BD Switzerland Sàrl, and The Wellcome Trust Limited.

1 373 **D. data sharing statement**

2

3 374 The article does not contain a report on analysed data.

4

5

6

7

8

9

10

11

12

13

14

15

16

17

18

19

20

21

22

23

24

25

26

27

28

29

30

31

32

33

34

35

36

37

38

39

40

41

42

43

44

45

46

47

48

49

50

51

52

53

54

55

56

57

58

59

60

For peer review only

1 375 **References**

2

3

4 376

5 377

6 378

7 379

8 380

9 381

10 382

11 383

12 384

13 385

14 386

15 387

16 388

17 388

18 389

19 390

20 391

21 392

22 393

23 394

24 395

25 396

26 397

27 397

28 398

29 399

30 400

31 401

32 402

33 403

34 404

35 405

36 406

37 407

38 407

39 408

40 409

41 410

42 411

43 412

44 413

45 414

46 415

47 416

48 417

49 418

50 419

51 420

52 421

53 422

54 423

55 424

56 425

57 425

58 425

59 425

60

1. O'Connor R, O'Doherty J, O'Regan A, Dunne C. Antibiotic use for acute respiratory tract infections (ARTI) in primary care; what factors affect prescribing and why is it important? A narrative review. *Ir J Med Sci.* 2018;**187**:969-86 doi: 10.1007/s11845-018-1774-5 [published Online First: 2018/03/14].
2. Prat C, Lacoma A. Bacteria in the respiratory tract-how to treat? Or do not treat? *Int J Infect Dis.* 2016;**51**:113-22 doi: 10.1016/j.ijid.2016.09.005 [published Online First: 2016/10/26].
3. Langer S, Horn J, Gottschick C, *et al.* Symptom Burden and Factors Associated with Acute Respiratory Infections in the First Two Years of Life-Results from the LoewenKIDS Cohort. *Microorganisms.* 2022;**10** doi: 10.3390/microorganisms10010111 [published Online First: 2022/01/22].
4. Cassini A, Högberg LD, Plachouras D, *et al.* Attributable deaths and disability-adjusted life-years caused by infections with antibiotic-resistant bacteria in the EU and the European Economic Area in 2015: a population-level modelling analysis. *Lancet Infect Dis.* 2019;**19**:56-66 doi: 10.1016/s1473-3099(18)30605-4 [published Online First: 2018/11/10].
5. Naylor NR, Atun R, Zhu N, *et al.* Estimating the burden of antimicrobial resistance: a systematic literature review. *Antimicrobial resistance and infection control.* 2018;**7**:58 doi: 10.1186/s13756-018-0336-y [published Online First: 2018/05/02].
6. Shrestha P, Cooper BS, Coast J, *et al.* Enumerating the economic cost of antimicrobial resistance per antibiotic consumed to inform the evaluation of interventions affecting their use. *Antimicrobial resistance and infection control.* 2018;**7**:98 doi: 10.1186/s13756-018-0384-3 [published Online First: 2018/08/18].
7. Kohns Vasconcelos M, Renk H, Popielska J, *et al.* SARS-CoV-2 testing and infection control strategies in European paediatric emergency departments during the first wave of the pandemic. *Eur J Pediatr.* 2020:1-7 doi: 10.1007/s00431-020-03843-w [published Online First: 2020/10/15].
8. Byington CL, Ampofo K, Stockmann C, *et al.* Community Surveillance of Respiratory Viruses Among Families in the Utah Better Identification of Germs-Longitudinal Viral Epidemiology (BIG-LoVE) Study. *Clinical Infectious Diseases.* 2015;**61**:1217-24 doi: 10.1093/cid/civ486 [published Online].
9. Kohns Vasconcelos M, Loens K, Sigfrid L, *et al.* Aetiology of acute respiratory infection in preschool children requiring hospitalisation in Europe-results from the PED-MERMAIDS multicentre case-control study. *BMJ Open Respir Res.* 2021;**8** doi: 10.1136/bmjresp-2021-000887 [published Online First: 2021/07/31].
10. PPAS4 Paediatric Group. Antibiotics and uncertainty of diagnosis in viral respiratory infections: point-prevalence survey across 15 European countries. *Acta Paediatr.* 2023; doi: 10.1111/apa.16855 [published Online First: 2023/05/25].
11. Kohns Vasconcelos M, Meyer Sauter PM, Santoro R, *et al.* Randomised placebo-controlled multicentre effectiveness trial of adjunct betamethasone therapy in hospitalised children with community-acquired pneumonia: a trial protocol for the KIDS-STEP trial. *BMJ open.* 2020;**10**:e041937 doi: 10.1136/bmjopen-2020-041937 [published Online First: 2020/12/31].
12. International Conference on Harmonization. E6 Guideline for Good Clinical Practice. 1996.
13. Declaration of Helsinki. Version October 2013.
14. ISO 14155, Clinical investigation of medical devices for human subjects -- Good clinical practice. 2011.
15. Doan Q, Enarson P, Kissoon N, Klassen TP, Johnson DW. Rapid viral diagnosis for acute febrile respiratory illness in children in the Emergency Department. *Cochrane Database of Systematic Reviews.* 2014; doi: 10.1002/14651858.CD006452.pub4 [published Online].
16. Rao S, Lamb MM, Moss A, *et al.* Effect of Rapid Respiratory Virus Testing on Antibiotic Prescribing Among Children Presenting to the Emergency Department With Acute Respiratory Illness: A Randomized Clinical Trial. *JAMA Network Open.* 2021;**4**:e2111836-e doi: 10.1001/jamanetworkopen.2021.11836 [published Online].
17. Mattila S, Paalanne N, Honkila M, Pokka T, Tapiainen T. Effect of Point-of-Care Testing for Respiratory Pathogens on Antibiotic Use in Children: A Randomized Clinical Trial. *JAMA Network Open.* 2022;**5**:e2216162-e doi: 10.1001/jamanetworkopen.2022.16162 [published Online].

## Acknowledgements

We thank all members of the trial committees, all families and children who have taken part, and all participating sites for their invaluable contributions to the trial.

ADEQUATE (Advanced Diagnostics for Enhanced Quality of Antibiotic prescription in respiratory Tract infections in Emergency rooms) Paediatric Trial Group:

Clinical Operations: Yasmine Yau, Elia Vitale, Giulio Vecchia, Federica D'Ambrosio, Wietske Bouwman, Marjolein van Esschoten, Frank Leus, David de Pooter, Leen Timbermont, Juan Pablo Rodriguez Ruiz, Benjamin Hommel, Marie Tessonneau, Malte Kohns Vasconcelos

Microbiology sub-study and biobanking: Leen Timbermont, Juan Pablo Rodriguez Ruiz, Surbhi Malhotra-Kumar

Health Economics Analysis: Benjamin Hommel, Marie Tessonneau, Florence Allantaz, Sophie Vandepitte, Jean-Louis Tissier, Philippe Cleuziat, Maarten J. Postma, Thea van Asselt, Pim van Dorst, Simon van der Pol, Fernando Antonanzas, Paula Rojas, Marino Gonzales, Dalia Dawoud, Claire Hawksworth

Data Safety Monitoring Board: Mark Lyttle, Harry Heijerman, Michelle Clements

Trial Steering Committee: Cristina Prat Aymerich, Florence Allantaz, Philippe Cleuziat, Herman Goossens, Marc Bonten, Julia A. Bielicki

Coordinating Investigator: Malte Kohns Vasconcelos

Trial statistician and methodologist: Andrew Atkinson, Henri van Werkhoven

Chief Investigator: Julia A. Bielicki

Trial Sites:

Aristotle University School of Health Sciences, Hippokration General Hospital, Thessaloniki: Maria

Simitsopoulou, Kalliopi Pantartzzi, Kostas Zarras, Argyro Ftergioti, Maria Kitsou, Aristeia Karypiadou, Charis

Lampada, Konstantina Charisi, Parthena Savvidou, Olga Tsiatsiou, Elsa Chorafa, Elisavet Michailidou,

Emmanuel Roilides, Elias Iosifidis

- 1 450 University Hospital Tübingen: Ann-Kathrin Stiegler, Carmen Junk, Kristina Kiesel, Maren Belschner, Maike  
2  
3 451 Seyfried, Kristina Schmauder, Silke Peter, Tobias Walter, Dominic Imort, Fabian Behret, Hanna Renk  
4  
5  
6 452 Universitäts-Kinderspital beider Basel (UKBB): Rahel Berger, Leon Pfeiffer, Emanuela Früh, Elena Robinson,  
7  
8 453 Andrea Marten, Claudia Werner, Malte Kohns Vasconcelos, Julia A. Bielicki  
9  
10  
11 454 Hospital Universitario 12 de Octubre, Madrid: Manuel Gijón, Rosa Calderón, Fátima Machín, Laura  
12  
13 455 Cabello, Andrea Seoane, Sofía Mesa, Lidia Oviedo, Luisa Barón, Irene Hernández, Pablo Rojo  
14  
15  
16 456 University Hospital Lewisham: Emma Gardiner, Lisa Capozzi, Alexander Ross, Anthony Hemeson, Maggie  
17  
18 457 Nyirenda Nyang'wa  
19  
20  
21 458 St. George's Hospital, London: Louisa Brock, Cecilia Hultin, Louise F Hill  
22  
23  
24 459 Ospedale Regionale di Bellinzona e Valli: Alessia Severi Conti, Gianluca Gualco, Federica Vanoni  
25  
26  
27 460  
28  
29  
30  
31  
32  
33  
34  
35  
36  
37  
38  
39  
40  
41  
42  
43  
44  
45  
46  
47  
48  
49  
50  
51  
52  
53  
54  
55  
56  
57  
58  
59  
60



STANDARD PROTOCOL ITEMS: RECOMMENDATIONS FOR INTERVENTIONAL TRIALS

SPIRIT 2013 Checklist: Recommended items to address in a clinical trial protocol and related documents\*

| Section/item                      | Item No | Description                                                                                                                                                                                                                                                                                                                                |
|-----------------------------------|---------|--------------------------------------------------------------------------------------------------------------------------------------------------------------------------------------------------------------------------------------------------------------------------------------------------------------------------------------------|
| <b>Administrative information</b> |         |                                                                                                                                                                                                                                                                                                                                            |
| Title ✓                           | 1       | Descriptive title identifying the study design, population, interventions, and, if applicable, trial acronym                                                                                                                                                                                                                               |
| Trial registration ✓              | 2a      | Trial identifier and registry name. If not yet registered, name of intended registry                                                                                                                                                                                                                                                       |
|                                   | 2b      | All items from the World Health Organization Trial Registration Data Set                                                                                                                                                                                                                                                                   |
| Protocol version I225             | 3       | Date and version identifier                                                                                                                                                                                                                                                                                                                |
| Funding ✓                         | 4       | Sources and types of financial, material, and other support                                                                                                                                                                                                                                                                                |
| Roles and responsibilities        | 5a      | Names, affiliations, and roles of protocol contributors <b>contributor statement and acknowledgements</b>                                                                                                                                                                                                                                  |
|                                   | 5b      | Name and contact information for the trial sponsor named <b>I225-6</b>                                                                                                                                                                                                                                                                     |
|                                   | 5c      | Role of study sponsor and funders, if any, in study design; collection, management, analysis, and interpretation of data; writing of the report; and the decision to submit the report for publication, including whether they will have ultimate authority over any of these activities <b>contributor statement and acknowledgements</b> |
|                                   | 5d      | Composition, roles, and responsibilities of the coordinating centre, steering committee, endpoint adjudication committee, data management team, and other individuals or groups overseeing the trial, if applicable (see Item 21a for data monitoring committee) <b>contributor statement and acknowledgements</b>                         |
| <b>Introduction</b>               |         |                                                                                                                                                                                                                                                                                                                                            |
| Background and rationale          | 6a      | Description of research question and justification for undertaking the trial, including summary of relevant studies (published and unpublished) examining benefits and harms for each intervention <b>I36-61, 65-7, 255-7</b>                                                                                                              |
|                                   | 6b      | Explanation for choice of comparators <b>I56-61</b>                                                                                                                                                                                                                                                                                        |
| Objectives                        | 7       | Specific objectives or hypotheses <b>I69-72</b>                                                                                                                                                                                                                                                                                            |

|    |                                                                     |     |                                                                                                                                                                                                                                                                                                                                                                                                                   |
|----|---------------------------------------------------------------------|-----|-------------------------------------------------------------------------------------------------------------------------------------------------------------------------------------------------------------------------------------------------------------------------------------------------------------------------------------------------------------------------------------------------------------------|
| 1  |                                                                     |     |                                                                                                                                                                                                                                                                                                                                                                                                                   |
| 2  | Trial design                                                        | 8   | Description of trial design including type of trial (eg, parallel group, crossover, factorial, single group), allocation ratio, and framework (eg, superiority, equivalence, noninferiority, exploratory) <b>II69,96,145</b>                                                                                                                                                                                      |
| 3  |                                                                     |     |                                                                                                                                                                                                                                                                                                                                                                                                                   |
| 4  |                                                                     |     |                                                                                                                                                                                                                                                                                                                                                                                                                   |
| 5  |                                                                     |     |                                                                                                                                                                                                                                                                                                                                                                                                                   |
| 6  |                                                                     |     |                                                                                                                                                                                                                                                                                                                                                                                                                   |
| 7  |                                                                     |     |                                                                                                                                                                                                                                                                                                                                                                                                                   |
| 8  | <b>Methods: Participants, interventions, and outcomes</b>           |     |                                                                                                                                                                                                                                                                                                                                                                                                                   |
| 9  |                                                                     |     |                                                                                                                                                                                                                                                                                                                                                                                                                   |
| 10 | Study setting                                                       | 9   | Description of study settings (eg, community clinic, academic hospital) and list of countries where data will be collected. Reference to where list of study sites can be obtained <b>II73-6</b>                                                                                                                                                                                                                  |
| 11 |                                                                     |     |                                                                                                                                                                                                                                                                                                                                                                                                                   |
| 12 |                                                                     |     |                                                                                                                                                                                                                                                                                                                                                                                                                   |
| 13 |                                                                     |     |                                                                                                                                                                                                                                                                                                                                                                                                                   |
| 14 | Eligibility criteria                                                | 10  | Inclusion and exclusion criteria for participants. If applicable, eligibility criteria for study centres and individuals who will perform the interventions (eg, surgeons, psychotherapists) <b>table 1, II84-8</b>                                                                                                                                                                                               |
| 15 |                                                                     |     |                                                                                                                                                                                                                                                                                                                                                                                                                   |
| 16 |                                                                     |     |                                                                                                                                                                                                                                                                                                                                                                                                                   |
| 17 |                                                                     |     |                                                                                                                                                                                                                                                                                                                                                                                                                   |
| 18 |                                                                     |     |                                                                                                                                                                                                                                                                                                                                                                                                                   |
| 19 | Interventions                                                       | 11a | Interventions for each group with sufficient detail to allow replication, including how and when they will be administered <b>II100-12</b>                                                                                                                                                                                                                                                                        |
| 20 |                                                                     |     |                                                                                                                                                                                                                                                                                                                                                                                                                   |
| 21 |                                                                     |     |                                                                                                                                                                                                                                                                                                                                                                                                                   |
| 22 |                                                                     | 11b | Criteria for discontinuing or modifying allocated interventions for a given trial participant (eg, drug dose change in response to harms, participant request, or improving/worsening disease) <b>n/a</b>                                                                                                                                                                                                         |
| 23 |                                                                     |     |                                                                                                                                                                                                                                                                                                                                                                                                                   |
| 24 |                                                                     |     |                                                                                                                                                                                                                                                                                                                                                                                                                   |
| 25 |                                                                     |     |                                                                                                                                                                                                                                                                                                                                                                                                                   |
| 26 |                                                                     | 11c | Strategies to improve adherence to intervention protocols, and any procedures for monitoring adherence (eg, drug tablet return, laboratory tests) <b>n/a</b>                                                                                                                                                                                                                                                      |
| 27 |                                                                     |     |                                                                                                                                                                                                                                                                                                                                                                                                                   |
| 28 |                                                                     |     |                                                                                                                                                                                                                                                                                                                                                                                                                   |
| 29 |                                                                     |     |                                                                                                                                                                                                                                                                                                                                                                                                                   |
| 30 |                                                                     |     |                                                                                                                                                                                                                                                                                                                                                                                                                   |
| 31 |                                                                     | 11d | Relevant concomitant care and interventions that are permitted or prohibited during the trial <b>II96-9</b>                                                                                                                                                                                                                                                                                                       |
| 32 |                                                                     |     |                                                                                                                                                                                                                                                                                                                                                                                                                   |
| 33 |                                                                     |     |                                                                                                                                                                                                                                                                                                                                                                                                                   |
| 34 | Outcomes                                                            | 12  | Primary, secondary, and other outcomes, including the specific measurement variable (eg, systolic blood pressure), analysis metric (eg, change from baseline, final value, time to event), method of aggregation (eg, median, proportion), and time point for each outcome. Explanation of the clinical relevance of chosen efficacy and harm outcomes is strongly recommended <b>respective section (I116ff)</b> |
| 35 |                                                                     |     |                                                                                                                                                                                                                                                                                                                                                                                                                   |
| 36 |                                                                     |     |                                                                                                                                                                                                                                                                                                                                                                                                                   |
| 37 |                                                                     |     |                                                                                                                                                                                                                                                                                                                                                                                                                   |
| 38 |                                                                     |     |                                                                                                                                                                                                                                                                                                                                                                                                                   |
| 39 |                                                                     |     |                                                                                                                                                                                                                                                                                                                                                                                                                   |
| 40 |                                                                     |     |                                                                                                                                                                                                                                                                                                                                                                                                                   |
| 41 |                                                                     |     |                                                                                                                                                                                                                                                                                                                                                                                                                   |
| 42 | Participant timeline                                                | 13  | Time schedule of enrolment, interventions (including any run-ins and washouts), assessments, and visits for participants. A schematic diagram is highly recommended (see Figure) <b>II130-41, we decided against a diagram because the structure of FU is very simple in this trial</b>                                                                                                                           |
| 43 |                                                                     |     |                                                                                                                                                                                                                                                                                                                                                                                                                   |
| 44 |                                                                     |     |                                                                                                                                                                                                                                                                                                                                                                                                                   |
| 45 |                                                                     |     |                                                                                                                                                                                                                                                                                                                                                                                                                   |
| 46 |                                                                     |     |                                                                                                                                                                                                                                                                                                                                                                                                                   |
| 47 |                                                                     |     |                                                                                                                                                                                                                                                                                                                                                                                                                   |
| 48 |                                                                     |     |                                                                                                                                                                                                                                                                                                                                                                                                                   |
| 49 | Sample size                                                         | 14  | Estimated number of participants needed to achieve study objectives and how it was determined, including clinical and statistical assumptions supporting any sample size calculations <b>respective section (I142ff)</b>                                                                                                                                                                                          |
| 50 |                                                                     |     |                                                                                                                                                                                                                                                                                                                                                                                                                   |
| 51 |                                                                     |     |                                                                                                                                                                                                                                                                                                                                                                                                                   |
| 52 |                                                                     |     |                                                                                                                                                                                                                                                                                                                                                                                                                   |
| 53 |                                                                     |     |                                                                                                                                                                                                                                                                                                                                                                                                                   |
| 54 |                                                                     |     |                                                                                                                                                                                                                                                                                                                                                                                                                   |
| 55 | Recruitment                                                         | 15  | Strategies for achieving adequate participant enrolment to reach target sample size <b>n/a</b>                                                                                                                                                                                                                                                                                                                    |
| 56 |                                                                     |     |                                                                                                                                                                                                                                                                                                                                                                                                                   |
| 57 |                                                                     |     |                                                                                                                                                                                                                                                                                                                                                                                                                   |
| 58 | <b>Methods: Assignment of interventions (for controlled trials)</b> |     |                                                                                                                                                                                                                                                                                                                                                                                                                   |
| 59 |                                                                     |     |                                                                                                                                                                                                                                                                                                                                                                                                                   |
| 60 |                                                                     |     |                                                                                                                                                                                                                                                                                                                                                                                                                   |



## Allocation:

- 1  
2  
3  
4      Sequence      16a      Method of generating the allocation sequence (eg, computer-  
5      generation                generated random numbers), and list of any factors for stratification.  
6                          To reduce predictability of a random sequence, details of any  
7                          planned restriction (eg, blocking) should be provided in a separate  
8                          document that is unavailable to those who enrol participants or  
9                          assign interventions **II108-11**  
10  
11  
12      Allocation      16b      Mechanism of implementing the allocation sequence (eg, central  
13      concealment                telephone; sequentially numbered, opaque, sealed envelopes),  
14      mechanism                describing any steps to conceal the sequence until interventions are  
15                          assigned **II108-11**  
16  
17      Implementatio      16c      Who will generate the allocation sequence, who will enrol  
18      n                participants, and who will assign participants to interventions **II108-11**  
19  
20  
21      Blinding      17a      Who will be blinded after assignment to interventions (eg, trial  
22      (masking)                participants, care providers, outcome assessors, data analysts), and  
23                          how **II113-4**  
24  
25                17b      If blinded, circumstances under which unblinding is permissible, and  
26                          procedure for revealing a participant's allocated intervention during  
27                          the trial **n/a**  
28  
29

**Methods: Data collection, management, and analysis**

- 30  
31  
32      Data collection      18a      Plans for assessment and collection of outcome, baseline, and other  
33      methods                trial data, including any related processes to promote data quality  
34                          (eg, duplicate measurements, training of assessors) and a  
35                          description of study instruments (eg, questionnaires, laboratory tests)  
36                          along with their reliability and validity, if known. Reference to where  
37                          data collection forms can be found, if not in the protocol **II130-41**  
38  
39                18b      Plans to promote participant retention and complete follow-up,  
40                          including list of any outcome data to be collected for participants who  
41                          discontinue or deviate from intervention protocols **II139-41**  
42  
43      Data      19      Plans for data entry, coding, security, and storage, including any  
44      management                related processes to promote data quality (eg, double data entry;  
45                          range checks for data values). Reference to where details of data  
46                          management procedures can be found, if not in the protocol **II133-4,**  
47                          **202ff**  
48  
49      Statistical      20a      Statistical methods for analysing primary and secondary outcomes.  
50      methods                Reference to where other details of the statistical analysis plan can  
51                          be found, if not in the protocol **respective section (I158ff)**  
52  
53                20b      Methods for any additional analyses (eg, subgroup and adjusted  
54                          analyses) **referred to SAP**  
55  
56  
57  
58  
59  
60

1  
2 20c Definition of analysis population relating to protocol non-adherence  
3 (eg, as randomised analysis), and any statistical methods to handle  
4 missing data (eg, multiple imputation) **referred to SAP**  
5

6 **Methods: Monitoring**  
7

8 Data monitoring 21a Composition of data monitoring committee (DMC); summary of its  
9 role and reporting structure; statement of whether it is independent  
10 from the sponsor and competing interests; and reference to where  
11 further details about its charter can be found, if not in the protocol.  
12 Alternatively, an explanation of why a DMC is not needed  
13 **acknowledgements**  
14  
15  
16 21b Description of any interim analyses and stopping guidelines,  
17 including who will have access to these interim results and make the  
18 final decision to terminate the trial **n/a**  
19  
20  
21 Harms 22 Plans for collecting, assessing, reporting, and managing solicited and  
22 spontaneously reported adverse events and other unintended effects  
23 of trial interventions or trial conduct **table 2 and I1216-7**  
24  
25 Auditing 23 Frequency and procedures for auditing trial conduct, if any, and  
26 whether the process will be independent from investigators and the  
27 sponsor **I1218-9**  
28  
29

30 **Ethics and dissemination**  
31

32 Research ethics 24 Plans for seeking research ethics committee/institutional review  
33 approval board (REC/IRB) approval **respective section (I222ff)**  
34  
35 Protocol 25 Plans for communicating important protocol modifications (eg,  
36 amendments outcomes, analyses) to relevant parties  
37 (eg, investigators, REC/IRBs, trial participants, trial registries,  
38 journals, regulators) **respective section (I222ff)**  
39  
40  
41 Consent or 26a Who will obtain informed consent or assent from potential trial  
42 assent participants or authorised surrogates, and how (see Item 32)  
43 **respective section (I83ff)**  
44  
45 26b Additional consent provisions for collection and use of participant  
46 data and biological specimens in ancillary studies, if applicable **I197-**  
47 **210**  
48  
49  
50 Confidentiality 27 How personal information about potential and enrolled participants  
51 will be collected, shared, and maintained in order to protect  
52 confidentiality before, during, and after the trial **I1133-4, 202ff**  
53  
54 Declaration of 28 Financial and other competing interests for principal investigators for  
55 interests the overall trial and each study site **funding and competing interests**  
56 **statements**  
57  
58  
59  
60

|    |                               |     |                                                                                                                                                                                                                                                                                                                        |
|----|-------------------------------|-----|------------------------------------------------------------------------------------------------------------------------------------------------------------------------------------------------------------------------------------------------------------------------------------------------------------------------|
| 1  |                               |     |                                                                                                                                                                                                                                                                                                                        |
| 2  | Access to data                | 29  | Statement of who will have access to the final trial dataset, and disclosure of contractual agreements that limit such access for investigators <b>data sharing statement</b>                                                                                                                                          |
| 3  |                               |     |                                                                                                                                                                                                                                                                                                                        |
| 4  |                               |     |                                                                                                                                                                                                                                                                                                                        |
| 5  |                               |     |                                                                                                                                                                                                                                                                                                                        |
| 6  | Ancillary and post-trial care | 30  | Provisions, if any, for ancillary and post-trial care, and for compensation to those who suffer harm from trial participation <b>n/a</b>                                                                                                                                                                               |
| 7  |                               |     |                                                                                                                                                                                                                                                                                                                        |
| 8  |                               |     |                                                                                                                                                                                                                                                                                                                        |
| 9  | Dissemination policy          | 31a | Plans for investigators and sponsor to communicate trial results to participants, healthcare professionals, the public, and other relevant groups (eg, via publication, reporting in results databases, or other data sharing arrangements), including any publication restrictions <b>respective section (I239ff)</b> |
| 10 |                               |     |                                                                                                                                                                                                                                                                                                                        |
| 11 |                               |     |                                                                                                                                                                                                                                                                                                                        |
| 12 |                               |     |                                                                                                                                                                                                                                                                                                                        |
| 13 |                               |     |                                                                                                                                                                                                                                                                                                                        |
| 14 |                               |     |                                                                                                                                                                                                                                                                                                                        |
| 15 |                               |     |                                                                                                                                                                                                                                                                                                                        |
| 16 |                               | 31b | Authorship eligibility guidelines and any intended use of professional writers <b>n/a</b>                                                                                                                                                                                                                              |
| 17 |                               |     |                                                                                                                                                                                                                                                                                                                        |
| 18 |                               |     |                                                                                                                                                                                                                                                                                                                        |
| 19 |                               |     |                                                                                                                                                                                                                                                                                                                        |
| 20 |                               | 31c | Plans, if any, for granting public access to the full protocol, participant-level dataset, and statistical code <b>none available yet</b>                                                                                                                                                                              |
| 21 |                               |     |                                                                                                                                                                                                                                                                                                                        |
| 22 |                               |     |                                                                                                                                                                                                                                                                                                                        |
| 23 | <b>Appendices</b>             |     |                                                                                                                                                                                                                                                                                                                        |
| 24 |                               |     |                                                                                                                                                                                                                                                                                                                        |
| 25 | Informed consent materials    | 32  | Model consent form and other related documentation given to participants and authorised surrogates <b>supplement</b>                                                                                                                                                                                                   |
| 26 |                               |     |                                                                                                                                                                                                                                                                                                                        |
| 27 |                               |     |                                                                                                                                                                                                                                                                                                                        |
| 28 | Biological specimens          | 33  | Plans for collection, laboratory evaluation, and storage of biological specimens for genetic or molecular analysis in the current trial and for future use in ancillary studies, if applicable <b>II186ff</b>                                                                                                          |
| 29 |                               |     |                                                                                                                                                                                                                                                                                                                        |
| 30 |                               |     |                                                                                                                                                                                                                                                                                                                        |
| 31 |                               |     |                                                                                                                                                                                                                                                                                                                        |

32 \*It is strongly recommended that this checklist be read in conjunction with the SPIRIT 2013  
 33 Explanation & Elaboration for important clarification on the items. Amendments to the  
 34 protocol should be tracked and dated. The SPIRIT checklist is copyrighted by the SPIRIT  
 35 Group under the Creative Commons "[Attribution-NonCommercial-NoDerivs 3.0 Unported](https://creativecommons.org/licenses/by-nc-nd/3.0/)"  
 36 license.  
 37  
 38  
 39  
 40  
 41  
 42  
 43  
 44  
 45  
 46  
 47  
 48  
 49  
 50  
 51  
 52  
 53  
 54  
 55  
 56  
 57  
 58  
 59  
 60

# BMJ Open

## Randomised multi-centre effectiveness trial of rapid syndromic testing by panel assay in children presenting to European emergency departments with acute respiratory infections – trial protocol for the ADEQUATE Paediatric trial

|                                 |                                                                                                                                                                                           |
|---------------------------------|-------------------------------------------------------------------------------------------------------------------------------------------------------------------------------------------|
| Journal:                        | <i>BMJ Open</i>                                                                                                                                                                           |
| Manuscript ID                   | bmjopen-2023-076338.R2                                                                                                                                                                    |
| Article Type:                   | Protocol                                                                                                                                                                                  |
| Date Submitted by the Author:   | 04-Apr-2024                                                                                                                                                                               |
| Complete List of Authors:       | ADEQUATE Paediatric Trial Group, ADEQUATE Paediatric Trial Group; St George's University of London, Antimicrobial Resistance Research Group, Centre for Neonatal and Paediatric Infection |
| <b>Primary Subject Heading</b>: | Emergency medicine                                                                                                                                                                        |
| Secondary Subject Heading:      | Paediatrics, Respiratory medicine, Infectious diseases                                                                                                                                    |
| Keywords:                       | Respiratory infections < THORACIC MEDICINE, ACCIDENT & EMERGENCY MEDICINE, Paediatric A&E and ambulatory care < PAEDIATRICS, INFECTIOUS DISEASES                                          |
|                                 |                                                                                                                                                                                           |

SCHOLARONE™  
Manuscripts

1 **Randomised multi-centre effectiveness trial of rapid syndromic testing by panel assay in children**  
2 **presenting to European emergency departments with acute respiratory infections – trial protocol for the**  
3 **ADEQUATE Paediatric trial**

4  
5 ADEQUATE Paediatric Trial Group  
6  
7  
8  
9

10 Keywords:

11  
12 pragmatic trial, acute respiratory infection, syndromic testing, multiplex PCR, point-of-care testing  
13  
14  
15  
16  
17  
18  
19  
20  
21  
22  
23  
24  
25  
26  
27  
28  
29  
30  
31  
32  
33  
34  
35  
36  
37  
38  
39  
40  
41  
42  
43  
44  
45

46 Correspondence:

47  
48 Antimicrobial Resistance Research Group, Centre for Neonatal and Paediatric Infection  
49

50 St. George's, University of London

51 Cranmer Terrace

52 London, SE17 0RE

53 United Kingdom

54 Email: m.kohnsvasconcelos@uke.de  
55  
56  
57  
58  
59  
60

**ABSTRACT**

**Introduction:** Syndromic panel assays, i.e. using one test to simultaneously target multiple pathogens with overlapping signs and symptoms, have been integrated into routine paediatric care over the past decade, mainly for more severely ill and hospitalised patients. Their wider availability and short turnaround times open the possibility to apply them to non-hospitalised patients as well. In this context, it is important to trial how clinicians make use of pathogen detection data and if their early availability influences management decisions, particularly antibiotic use and hospitalisation.

**Methods and analysis:** ADEQUATE is an individually-randomised, controlled, open-label effectiveness trial comparing the impact of a respiratory pathogen panel assay (BIOFIRE® Respiratory Panel 2.1*plus*) used as a rapid syndromic test on nasopharyngeal swabs in addition to the standard of care versus standard of care alone. The trial will 1:1 randomise 520 participants under the age of 18 at 9 paediatric emergency departments in 6 European countries. Inclusion criteria for the trial consist of two sets, with the first describing respiratory tract infections in paediatric patients and the second describing the situation of potential management uncertainty in which test results may immediately affect management decisions. Enrolment started in July 2021 and is expected to be complete in early 2024. We will perform a two-sample t-test assuming a pooled variance estimate to compare the log transformed mean time on antibiotic treatment (in hours) and number of days alive out of the hospital within 14 days after study enrolment between the control and intervention arms.

**Ethics and dissemination:** The trial protocol and materials were approved by research ethics committees in all participating countries. The respiratory pathogen panel assay is CE marked and FDA cleared for diagnostic use. Participants and caregivers provide informed consent prior to study procedures commencing. The trial results will be published in peer-reviewed journals and at national and international conferences. Key messages will also be disseminated via press and social media where appropriate.

**Trial registration number:** NCT04781530

1 27 **Strengths and limitations of this study (max 5 bullet points):**

2

3

4 28 - The eligibility criteria in this trial are tailored to include a patient population where decisions are

5

6 29 pending and test results may impact initial management decisions.

7

8 30 - The trial's setting spans European countries with some difference in available resources and the

9

10 31 results will therefore likely be generalisable to other high-income country settings.

11

12 32 - The panel assay used in the trial is assessed as a test close to the point of care in the emergency

13

14 33 department and use of the test in other scenarios may result in different estimates for

15

16 34 effectiveness.

17

18 35 - Due to the pragmatic design with minimised interference with routine procedures and clinician

19

20 36 judgement, results may lose applicability with major changes in the respective health system.

21

22

23 37 -

24

25

26

27

28

29

30

31

32

33

34

35

36

37

38

39

40

41

42

43

44

45

46

47

48

49

50

51

52

53

54

55

56

57

58

59

60

## 38 INTRODUCTION

39 Community-acquired acute respiratory infections (ARI) are the most frequent reason for unscheduled  
40 healthcare visits and at the same time, the most frequent cause of inappropriate antibiotic use.[1, 2] While  
41 most ARI cause mild symptoms and are self-limiting, lower respiratory tract infections, including  
42 pneumonia, globally cause more than half a million deaths in <5 year old children per year.[3] Especially  
43 since the wide roll-out of conjugate vaccines, most of these infections in children do not require treatment  
44 with antibiotics. Antibiotic consumption is a driver of development of antimicrobial resistance (AMR) and  
45 where use of antibiotics in the individual is not warranted, the ecological and economic cost of  
46 antimicrobial resistance per antibiotic consumed is considerable.[4-6]

47 Determining which pathogen is the likely cause of an infectious episode is one common approach for  
48 clinicians to decide on the probability of antibiotic treatment being beneficial in a patient. In paediatric  
49 routine care, pathogen testing is usually limited to upper respiratory tract (URT) samples.[7] A wide range  
50 of common respiratory pathogens that may cause more severe disease are frequently present in the URT of  
51 asymptomatic children as well, thereby making it more difficult to determine the causative pathogen of an  
52 episode.[8] While for some viral pathogens, especially RSV, influenza virus, parainfluenza virus and human  
53 metapneumovirus, there is a high probability that their detection explains the cause of an episode of  
54 severe ARI, for others, including *Streptococcus pneumoniae* and human rhinovirus, the association is much  
55 weaker.[9] Detection of a viral pathogen does not exclude a bacterial aetiology of an illness episode and  
56 uncertainty of aetiology may increase the probability of antibiotic prescriptions.[10]

57 Children hospitalised for ARI stay in hospital for a median of 2 to 3 days and resolution of symptoms takes  
58 much longer.[3, 11] Interventions reducing hospital stays have a high potential to reduce psycho-social  
59 costs for families and economic costs for the health system.

60 Syndromic panel assays, i.e. using one test to simultaneously target multiple pathogens with overlapping  
61 signs and symptoms, have been integrated into routine paediatric care including in emergency  
62 departments over the past decade, mainly for more severely ill and hospitalised patients. Their wider  
63 availability and short turnaround times open the possibility to apply them to non-hospitalised patients as



1 64 well. In this context, it is important to trial how clinicians make use of pathogen detection data and if their  
2  
3 65 early availability influences management decisions.  
4  
5

6 66 VALUE-Dx is the first Innovative Medicines Initiative project initiated by six in vitro diagnostic companies  
7  
8 67 who joined forces with 20 non-industry partners to combat AMR and improve patient outcomes. The  
9  
10 68 multidisciplinary consortium involves clinicians, microbiologists, health economists, social scientists, and  
11  
12 69 industry. The trial described here is a part of this VALUE-Dx project. It aims to determine if the integration  
13  
14  
15 70 of a rapid syndromic test at an early point in time in the management workflow in paediatric emergency  
16  
17 71 departments can influence the decisions to treat a patient with antibiotics or to hospitalise them.  
18  
19  
20  
21  
22  
23  
24  
25  
26  
27  
28  
29  
30  
31  
32  
33  
34  
35  
36  
37  
38  
39  
40  
41  
42  
43  
44  
45  
46  
47  
48  
49  
50  
51  
52  
53  
54  
55  
56  
57  
58  
59  
60

## 72 METHODS AND ANALYSIS

73 ADEQUATE is an individually randomised, controlled, open-label superiority effectiveness trial comparing  
74 the impact of a respiratory pathogen panel assay used as a rapid syndromic test in addition to the standard  
75 of care versus standard of care alone on antibiotic use and hospitalisations in paediatric patients with ARI  
76 presenting to EDs. The trial is part of workpackage 4 of the VALUE-Dx consortium.

### 77 Trial setting

78 The trial enrolls participants at 7 paediatric EDs in 5 European countries (Germany, Greece, Spain,  
79 Switzerland and the United Kingdom). Enrolment started in July 2021 (trial start date: 1<sup>st</sup> July 2021) and is  
80 expected to be complete in early 2024 (planned end date – last patient last visit: 31<sup>st</sup> March 2024).

### 81 Trial population

82 Inclusion criteria for the trial consist of two sets, with the first describing respiratory tract infections in  
83 paediatric patients and the second describing the situation of potential management uncertainty in which  
84 test results may immediately affect management decisions. Few exclusion criteria were introduced to  
85 increase generalisability of the trial results. The full eligibility criteria are listed in table 1.

| <i>Inclusion criteria (all must be fulfilled)</i>                                                                                                                                                                                                                                                                                                                                                                                                                                                                                                                                                                                                                                                                                                                                                                                   |
|-------------------------------------------------------------------------------------------------------------------------------------------------------------------------------------------------------------------------------------------------------------------------------------------------------------------------------------------------------------------------------------------------------------------------------------------------------------------------------------------------------------------------------------------------------------------------------------------------------------------------------------------------------------------------------------------------------------------------------------------------------------------------------------------------------------------------------------|
| <p>1. ARI presentation<br/>Children of any age (under the age of 18) presenting to the ED with an acute illness (present for 14 days or less) with temperature <math>\geq 38.0^{\circ}\text{C}</math> measured at presentation or parental report of fever within the previous 72 hours<br/>AND at least two of the below:</p> <ul style="list-style-type: none"> <li>• Cough</li> <li>• Abnormal sounds on chest auscultation (crackles, reduced breath sounds, bronchial breathing, wheezing)</li> <li>• Clinical signs of dyspnea (chest indrawing, nasal flaring, grunting)</li> <li>• Signs of respiratory dysfunction: tachypnoea for age (as per hospital standard) or decreased oxygen saturation (&lt;92% in room air)</li> <li>• Signs of reduced general state: poor feeding, vomiting or lethargy/drowsiness</li> </ul> |
| <p>2. Management uncertainty<br/>At time of screening</p> <ul style="list-style-type: none"> <li>• Patient has undergone first assessment by managing clinical team (doctor or nurse, incl. triage)</li> <li>• Hospitalisation is not yet determined, i.e., neither by clinical presentation definitely requiring hospitalisation (e.g., per local guideline) nor by fixed decision of managing clinical team; admission to a short-stay unit or surveillance unit is not considered a hospitalisation for this trial</li> <li>• Antibiotic treatment or hospitalisation is being considered by the managing team</li> <li>• The rapid syndromic diagnostic test result can be awaited up to 4 hours before the decision to discharge the patient or to initiate antibiotic treatment is made</li> </ul>                            |
| <i>Exclusion criteria (none may be fulfilled)</i>                                                                                                                                                                                                                                                                                                                                                                                                                                                                                                                                                                                                                                                                                                                                                                                   |

1. Development of acute respiratory infection more than 48 hours after hospital admission (hospital acquired);
2. Patients with a severe underlying medical condition dictating management decisions including hospitalisation and/or antibiotic treatment (e.g., cystic fibrosis, immunosuppression);
3. Hospitalisation for at least 24 hours within the last 14 days (healthcare-associated);
4. Confirmed pregnancy or breastfeeding;
5. Any clinically significant abnormality identified at the time of screening that in the judgment of the Investigator would preclude safe completion of the study or constrain endpoints assessment such as major systemic diseases or patients with short life expectancy;
6. Inability to obtain informed consent;
7. Alternative noninfectious diagnosis that explains clinical symptoms.

Table 1: Eligibility criteria

### Screening, recruitment and consent

During working hours of study staff, patients in the emergency department or short-stay unit are screened for eligibility by study staff. In most instances, screening takes place as soon as possible after initial triage but screening at any later stage within the emergency department was possible. Informed consent is sought from all patients meeting the eligibility criteria at the time of screening. The health status of patients might rapidly deteriorate between screening and randomisation. Therefore, all eligibility criteria are be re-evaluated and confirmed by trained and delegated trial staff prior to the decision to randomise the patient.

Screening failures are defined as patients who were found eligible per screening but have either not given informed consent, or have deteriorated between screening and randomisation, and therefore no longer fulfil eligibility criteria. Screening failures are recorded anonymously on a screening log detailing the reason for screening failure and are not randomised. No diagnostic procedures are performed for the purpose of checking eligibility criteria specifically, i.e., any procedures indicated for the standard of care patient management will be performed but none will be added to check eligibility criteria.

### Randomisation and blinding

Participants are randomised with equal probability into two allocation groups: (a) the control group, receiving the current standard of care at the respective trial site, which may include rapid diagnostic testing for specific pathogens or syndromic testing with results reported after a longer time than four hours, or (b) the intervention group, receiving the standard of care plus immediately a nasopharyngeal swab tested with the BIOFIRE® Respiratory Panel 2.1*plus* (RP2.1*plus*). The intervention is a multiplexed nucleic acid test for

1 107 the simultaneous qualitative detection and identification of multiple respiratory viral and bacterial nucleic  
2  
3 108 acids in nasopharyngeal swabs obtained from patients suspected of respiratory tract infections. The assay is  
4  
5 109 licensed in CE marked and FDA cleared, for the use intended in this trial. The pathogens included in the  
6  
7 110 assay are adenovirus, coronaviruses (229 E, HKU1, NL63, OC43, SARS-CoV-2), human metapneumovirus,  
8  
9  
10 111 human rhinovirus/enterovirus, influenza A, including subtypes H1, H1-2009, and H3, influenza B, middle  
11  
12 112 east respiratory syndrome coronavirus (MERS-CoV), parainfluenza virus (1, 2, 3, 4), respiratory syncytial  
13  
14 113 virus, *Bordetella parapertussis*, *Bordetella pertussis*, *Chlamydia pneumoniae* and *Mycoplasma pneumoniae*.

17 114 After all eligibility criteria have been verified and informed consent has been obtained, randomisation is  
18  
19 115 performed using the built-in randomisation module of the electronic Case Report Form system (Research  
20  
21  
22 116 Online). Allocation is concealed until the moment of randomisation. To this end, block randomisation is  
23  
24 117 used with variable blocks of size 2, 4 and 6. Randomisation is stratified by centre. In the intervention group,  
25  
26 118 a URT swab is obtained by trained trial or clinical staff and submitted to the panel assay test with as little  
27  
28 119 delay as possible. After the decision to randomise the subject is made, subjects will not be excluded from  
29  
30 120 the trial. Due to the nature of the intervention, blinding is not possible. If the allocated intervention is not  
31  
32  
33 121 applied for any reason, this will be recorded and follow-up for the participant will be completed.

## 36 122 **Outcome measures and assessments**

38 123 The co-primary study endpoints are:

- 41 124 1. Days alive out of hospital within 14 days after study enrolment
- 44 125 2. Days on Therapy (DOT) with antibiotics within 14 days after study enrolment

47 126 14 days were selected over 30 days as time window for the primary endpoints because a potential superior  
48  
49 127 effect would be expected to be more immediate, and a shorter window resulted in a small gain in power.

52 128 Furthermore, delayed effects will still be captured in the secondary endpoints.

55 129 The secondary endpoints are listed in table 2.

57  
58  
59  
60

|                                  |
|----------------------------------|
| Non-inferiority safety endpoint: |
|----------------------------------|

- For initially hospitalised patients: i) any readmission, ii) ICU admission => 24 hours after hospitalisation, or iii) death, within 30 days after study enrolment
- For initially non-admitted patients: any admission or death within 30 days after study enrolment.

Direct costs and indirect costs within 30 days after enrolment, specifically cost of healthcare within 30 days after enrolment, including hospital and ICU days, utilisation of non-hospital services and cost of anti-infective and concomitant medication, and cost of workdays lost within 30 days, including days for childcare

Change in quality of life as determined by EQ-5D-5L (or suitable alternative for age), days away from usual childcare routine or school and healthcare utilisation on day 1, 14, and 30 after enrolment.

Proportion of participants with an identified respiratory pathogen in both study groups on randomisation day samples.

Proportion of participants on non-first-line anti-infective regimens (as defined by local guidelines)

Time to de-escalation and time to stop of anti-infective therapy

Proportion of hospitalised participants with detection of cephalosporin-, carbapenem- or quinolone-resistant Enterobacteriaceae on any standard of care samples >7 days after randomisation

Hours in individual or cohort isolation in hospitalised participants

Table 2: Secondary endpoints

Primary endpoints were adapted after a decision to terminate the recruitment of adult patients on a partner protocol on 3rd May 2022. The adult partner trial was terminated mainly because of slow recruitment and because of management workflows for patients having changed during the Covid-19 pandemic in ways that additionally impeded patient inclusions. Prior to this adaptation, the non-inferiority safety endpoint was considered a third co-primary endpoint. Because mortality in the study population in high-resource settings is extremely low, and secondary admission rates among children initially managed in the community as well as re-admission and secondary ICU admission rates among primarily admitted children are likely to be in the range of below 5%, this endpoint was judged to unlikely be relevant or appropriate for the paediatric population. Additionally, secondary admissions will still provide safety information on the first co-primary endpoint.

1 141 Participants are followed up until 30 days after randomisation. Standard of care clinical and microbiological  
2  
3 142 data are collected. The participant data set summarises the illness episode and outcome, microbiological  
4  
5 143 testing, antimicrobial use, use of healthcare facilities including hospitalisations and return to normal  
6  
7 144 activity, childcare arrangements and quality of life. Data is entered into case report forms in a GCP-  
8  
9  
10 145 compliant database held at the Julius Center, UMC Utrecht. Follow-up information including data for health  
11  
12 146 economic analysis is collected on day 14 (visit window: day 12 – 16) and on day 30 (visit window: day 28 –  
13  
14 147 32) after randomisation. Parents or participants themselves (where age-appropriate) are contacted by  
15  
16 148 study staff for the follow-up visits, usually via telephone but in case of hospitalisation or hospital  
17  
18 149 attendance during the visit window face-to-face visits are acceptable. Quality of life is measured by EQ-5D,  
19  
20  
21 150 using age-appropriate versions including proxy versions that are emailed to families. For children under the  
22  
23 151 age of three years, no validated version of the EQ-5D exists. Therefore, the the global rating scale on the  
24  
25 152 existing EQ-5D proxy version validated for children from three years of age onwards is used here. In case of  
26  
27  
28 153 failure to successfully contact families at the end of trial participation, the participant's general practitioner  
29  
30 154 is contacted to complete information on the primary endpoints.

### 33 155 **Sample size and power**

34  
35  
36 156 A reduction of one day in antibiotic treatment or increase of one day in days alive out of hospital were  
37  
38 157 chosen for a clinically relevant reduction in antibiotic prescribing and a reduction in hospital costs,  
39  
40 158 respectively. In children, the co-primary superiority endpoints are likely to be dominated by the DOT with  
41  
42 159 antibiotics, as ambulatory exposure to antibiotics is likely to be common in the absence of hospital  
43  
44 160 admission, whereas many admitted children would be expected to be treated with antibiotics as well.

45  
46  
47 161 The sample size estimation was performed for this endpoint. From a recent publication on variations in  
48  
49 162 antibiotic prescribing in febrile children presenting to European EDs, the standard deviation for days on  
50  
51 163 antibiotic treatment was estimated as 3.7 days.[12] Based on this, recruitment of 170 children per arm  
52  
53  
54 164 (total of 340 children) will be sufficient to detect a difference of one day in this endpoint (power 80%, alpha  
55  
56 165 0.05).

57  
58  
59 166 To account for uncertainty about the variability in both co-primary endpoints in the paediatric study  
60  
167 population, we adopt a highly conservative approach aiming to recruit 252 evaluable children per arm

1 168 (total of 504 children), resulting in adequate power to detect a difference in one day in both endpoints  
 2  
 3 169 (table 3), with the calculations performed for the “antibiotic prescribing” endpoint. Accounting for potential  
 4  
 5 170 loss to follow-up, we set a total recruitment target of 520 children.  
 6  
 7

| SD  | Delta | Alpha | Beta | Correction | Sample size per arm |
|-----|-------|-------|------|------------|---------------------|
| 2.5 | 1     | 0.025 | 0.2  | 1          | 99                  |
| 3.0 | 1     | 0.025 | 0.2  | 1          | 142                 |
| 3.5 | 1     | 0.025 | 0.2  | 1          | 193                 |
| 3.7 | 1     | 0.025 | 0.2  | 1          | 215                 |
| 4.0 | 1     | 0.025 | 0.2  | 1          | 252                 |
| 4.5 | 1     | 0.025 | 0.2  | 1          | 318                 |
| 5.0 | 1     | 0.025 | 0.2  | 1          | 393                 |

21  
 22 171 Table 3: Sample sizes for Days on antibiotic treatment (paediatric) using different assumptions  
 23  
 24

## 25 172 Analysis plan

26  
 27  
 28 173 The analysis will be performed by the trial statistician using the R language and environment for statistical  
 29  
 30 174 computing (version 3.6 or higher). Reporting will follow the CONSORT guidelines.  
 31

32  
 33 175 Both co-primary endpoints will be tested separately, and superiority is confirmed if either one or both are  
 34  
 35 176 superior in terms of the primary analysis.  
 36  
 37

38 177 To investigate differences between the two arms for each endpoint separately, a two-sample t-test of the  
 39  
 40 178 log transformed mean time (in hours) on antibiotic treatment or alive out of hospital comparing those on  
 41  
 42 179 the standard of care arm (control) and the intervention arm will be performed, assuming a pooled variance  
 43  
 44  
 45 180 estimate.  
 46

47  
 48 181 An adjusted linear mixed effects model will be fitted with log transformed days on antibiotic treatment or  
 49  
 50 182 days alive out of hospital as dependent variable, and an indicator variable for the randomised arm, age  
 51  
 52 183 groups (<5y, 5 to <18y) and comorbidities (stratified according to modified Charlson comorbidity index: 0,  
 53  
 54 184 1, +1) as independent variables. Further independent variables will be considered in post hoc analyses. The  
 55  
 56 185 model will include a random intercept for each country (and potentially, emergency department in country  
 57  
 58  
 59 186 if cluster sizes allow), accounting for clustering on these variables. Zero-inflated or similar models will be  
 60  
 187 considered if data are heavily skewed.

1 188 We anticipate days alive out of hospital data to be heavily right skewed in the full analysis set, and  
2  
3 189 therefore suitable transformations or modelling approaches will be considered as appropriate.  
4  
5

6 190 Subgroup analyses of the primary endpoints will include  
7

- 9 191 • by age groups (<5, >5)
- 10
- 11 192 • by admission at baseline (yes/no)
- 12
- 13 193 • by receipt of antibiotics at baseline (yes/no)
- 14
- 15
- 16 194 • for those on antibiotic therapy at baseline, we will dichotomise days on treatment into two groups  
17  
18 195 (0="1-5 days", 1=">5 days"), and fit a (mixed effects) logistic model with this grouping as  
19  
20 196 dependent variable, adjusting as above.
- 21
- 22 197 • by country
- 23
- 24
- 25 198 • by emergency department (if the number of patients allows).
- 26
- 27

28 199 A detailed analysis plan for all secondary objectives will be finalised before the trial's database closure and  
29  
30 200 will be under version control at the Paediatric Research Centre, University of Basel Children's Hospital.  
31  
32

### 33 201 **Sub-study and biobanking**

34

35  
36 202 The sub-study will have its own analysis plan which will be finalised before the respective database is  
37  
38 203 locked.  
39

40 204 The aim of the microbiology study, located at the University of Antwerp, is to use suitable methods,  
41  
42 205 including metagenomic sequencing, to characterise changes in microbiological colonisation and  
43  
44 206 antimicrobial resistance patterns dependent on treatment with antibiotics. In a subset of study sites and  
45  
46  
47 207 participants (up to 150 participants), additional oropharyngeal samples are obtained from participants. One  
48  
49 208 sample is obtained on the day of randomisation and one sample on day 30 (visit window: day 28 – 32) after  
50  
51 209 randomisation. Specific procedures for collection and processing are provided to sites. After receiving  
52  
53  
54 210 specific instructions, the day 30 swab can be obtained at home and sent to the local study site via mail.  
55

56 211 Inclusion in the microbiology study will require separate informed consent.  
57

58  
59 212 Biological samples obtained for the study (including leftovers from the specimens obtained for the  
60  
213 intervention and for the microbiology study) are be stored at all sites and shipped to the University of



1 214 Antwerp for inclusion in a biobank, subject to the condition that separate informed consent for biobanking  
2  
3 215 is given.  
4

5  
6 216 Participation in the main study does not depend on consent for the microbiology study or for biobanking.  
7

8  
9 217 **Monitoring**  
10

11  
12 218 Representatives of the trial management team and a designated study monitor conducted a remote site  
13  
14 219 initiation visit at each study site to verify qualifications of the local investigators and inform the local teams  
15  
16 220 of responsibilities and the procedures for ensuring adequate and correct documentation and use of the  
17  
18 221 electronic data capture system as well as providing training on implementing all trial activities.  
19

20  
21 222 Sites are requested to enter data in the eCRF within 5 working days following each subject's visit. The  
22  
23 223 monitor ensures that data is entered in a timely manner. When queries regarding the data entered in the  
24  
25 224 eCRF are raised, the site is expected to resolve them within 10 working days.  
26  
27

28  
29 225 The monitor visits a site at least once during the course of the study, when at least 3 subjects are  
30  
31 226 randomised and completed data collection in the eCRF up to at least Day 30. Depending on the subject  
32  
33 227 enrollment rate and any site-specific issues, the total number of on-site monitoring visits may be increased.  
34  
35

36 228 The visits include Source Data Verification (SDV) for selected variables: 100% SDV is performed on all  
37  
38 229 Informed Consent Form (ICF) versions and consent process in the source; a total of 10% of subjects (always  
39  
40 230 including the first 3 randomised subjects, thereafter randomly selected) have SDV performed on the  
41  
42 231 primary and secondary endpoint CRFs. 100% serious adverse events (S)AEs, serious adverse device effects  
43  
44 232 (S)ADEs and device deficiencies (DD) that are reported in accordance with the study protocol, including  
45  
46 233 potential unreported events for these subjects reviewed.  
47  
48

49  
50 234 In accordance with ICH GCP guidelines,[13] audits may be performed by the ethics committees and  
51  
52 235 competent authorities during the course of the study.  
53  
54

55 236  
56  
57  
58  
59  
60

## ETHICS AND DISSEMINATION

### Ethical and regulatory compliance

Prior to study conduct, the protocol, proposed patient information, consent form and other study-specific documents were approved by all local ethics committees, with the first approval received in Switzerland in June 2021 (Ethikkommission Nordwest- und Zentralschweiz (2021-00713)). The current protocol version is 4.0, approved between October 2022 and March 2023 for the respective trial sites. Changes compared to the first version are mainly concerned with the primary endpoint as explained above and do not include changes in the trial conduct. The trial is sponsored by the Penta Foundation, Corso Stati Uniti, 4, 35127 Padova, Italy. The industry partner bioMérieux supplied equipment, consumables and logistical support for the trial.

Before commencement of the trial, a risk classification following the ISO 201916 standard and ICH-GCP E6 guidelines was carried out. The risk classification of the ADEQUATE Study is defined as negligible, because participation in the intervention group has no significant additional risks compared to the standard of care.

This study is registered on <https://clinicaltrials.gov> (NCT04781530) since 1st March 2021

The study is carried out according to the protocol and with principles enunciated in the current version of the Declaration of Helsinki,[14] the guidelines of Good Clinical Practice (GCP) issued by ICH,[13] in case of medical device: the European Directive on medical devices 93/42/EEC and the ISO Norm 14155,[15].

### Patient and Public Involvement

This protocol was written without patient involvement. Patients or guardians were not invited to comment on the study design or to contribute to the writing or editing of this document for readability or accuracy.

### Dissemination of results

The data from all centres will be analysed together and published as soon as possible in peer-reviewed journals, as well as being presented at national or international conferences.

1 262 The results of this trial will be submitted for Open Access publication in high impact peer-reviewed journals  
2  
3 263 likely to be read by health professionals in the management of ARI in children in Europe. The work will be  
4  
5 264 presented at key medical conferences. To maximise the impact of the trial across Europe, its findings will be  
6  
7 265 disseminated more widely through abstracts for oral and poster presentations submitted to some of the  
8  
9  
10 266 main relevant national and international conferences.

11  
12  
13 267 Findings will further be distributed through activities of the VALUE-Dx consortium's workpackage 6,  
14  
15 268 including press releases, the consortium website and educational activities and materials. The social media  
16  
17 269 presence of the organisations involved will also be used to highlight news about the trial.

18  
19  
20 270 Datasets generated from the trial will be made accessible in line with regulatory requirements on request  
21  
22 271 to the trial consortium through the corresponding author.  
23  
24  
25  
26  
27  
28  
29  
30  
31  
32  
33  
34  
35  
36  
37  
38  
39  
40  
41  
42  
43  
44  
45  
46  
47  
48  
49  
50  
51  
52  
53  
54  
55  
56  
57  
58  
59  
60

**TRIAL STATUS AND DISCUSSION**

Currently, 421 children have been enrolled in the trial. Follow-up has been completed for 388 and 22 have missed the 14d and 28d follow-up visit, but data on primary endpoints may still be completed following GP enquiry. Recruitment accrual is at 80% of target.

Following strictly pragmatic trial design decisions, the trial will have limited ability to elucidate the potential mechanism that enables the test to be effective, or prevents it from being effective. For example, the protocol does not provide guidance on interpretation of test results. Clinicians' perceptions about the positive and negative predictive values of the test results for any specific aetiology are therefore not controlled in our trial. In clinical practice, these may change with longer-term trends of changing incidences of pathogens and the trial results may potentially be less applicable under these circumstances. On balance, we believe that this is outweighed by the gain in external validity that a pragmatic trial offers, namely that we expect the trial results to be broadly generalisable because we aimed to reduce introduction of selection bias.

The trial assesses the effectiveness of the diagnostic test in a specific setting, namely used close to the point of care in the emergency department. Patients in the trial's control group may have received the same or similar tests as long as results were only received after more than four hours. The effectiveness of the test may therefore be lower compared to a scenario in which the test was only compared to patients with no respiratory panel assay data available.

A limitation of the rapid syndromic test used is that it does not cover *S. pneumoniae* or other bacteria considered typical causes of acute lower respiratory tract infection. The trial does not offer any insight into whether such an assay might be effective in the same setting.

A 2014 Cochrane Review found a trend towards reduced antibiotic use with use of rapid syndromic tests in paediatric EDs.[16] Since then, two single-centre randomised controlled trials (RCT), one from Finland and one from the US, found no effect of a similar test as used in our trial on antibiotic prescribing in EDs.[17, 18]

Both trials employed a similar strategy of approaching children at an early point in time and before clinical assessment. Our trial differs in that children were not eligible if decisions on their hospitalisation had already been made, including through a fixed treatment guideline or standard operating procedure.

Additionally, children were excluded when it was deemed obvious from the start by clinicians that neither

1 300 antibiotics nor hospitalisation were considered. Also, both trials did not investigate duration of antibiotics,  
2  
3 301 thereby potentially missing an effect on antibiotic use if results from the test would make clinicians more  
4  
5 302 likely to stop antibiotics early. Finally, both trials were designed to show a difference in antibiotic  
6  
7 303 prescribing but did not complement this with decisions to hospitalise patients. Thus, our trial adds to the  
8  
9  
10 304 previous literature

- 11  
12 305 - by employing the same protocol across a range of different settings,
- 13  
14 306 - by studying the intervention in a population in which clinicians express an initial degree of  
15  
16 307 uncertainty about management,
- 17  
18 308 - by treating hospitalisation and its duration as equally important effects of a rapid syndromic test as  
19  
20  
21 309 treatment with antibiotics,
- 22  
23 310 - and by capturing delayed effects of the test on both

24  
25 311 The trial's primary endpoint was adapted after the start of the trial. Although this is often considered  
26  
27 312 acceptable, it is still a decision that needs careful deliberation and explanation. The ADEQUATE trial was  
28  
29  
30 313 initially designed as two partner trials in EDs, one in the adult and one in the paediatric population. The  
31  
32 314 primary outcomes were planned to be analysed together, thus a safety non-inferiority endpoint with high  
33  
34 315 relevance mainly for the adult population was introduced into the primary endpoints. Because of the low  
35  
36 316 risk of meeting this endpoint, demonstrating non-inferiority was dominating the sample size estimation for  
37  
38  
39 317 the paediatric trial. Following the obligation to restrict the number of individuals in clinical trials to the  
40  
41 318 number necessary to generate robust findings, we decided to move the non-inferiority endpoint to the  
42  
43 319 secondary endpoints as soon as the adult trial was terminated due to changes in routine care making the  
44  
45 320 trial unfeasible.

46  
47  
48 321 Paediatric ARI is a common condition with diverse aetiology. A diagnostic intervention reducing length of  
49  
50 322 hospital stay and antibiotics has a high potential to (a) reduce strain on healthcare resources, (b) reduce  
51  
52  
53 323 evolution of antimicrobial resistance and (c) improve children's and parents' well-being. The ADEQUATE  
54  
55 324 trial will provide conclusive evidence on the effectiveness of a rapid syndromic test for this purpose.  
56  
57

58 325

59  
60

**STATEMENTS****A. contributorship statement**

Members of the ADEQUATE Paediatric Trial Group contributed to the conceptualisation, data curation, funding acquisition, investigation, methodology, project administration, formal analysis, software, resources, supervision and writing of the original draft. All group members contributed to review and editing of the manuscript.

**B. competing interests**

Benjamin Hommel, Marie Tessonneau, Sophie Vandepitte, Jean-Louis Tissier, Florence Allantaz and Philippe Cleuziat are employees of bioMérieux, the manufacturer of the diagnostic tool under study in this trial. They were involved in the administration of the trial, provided resources and monitored the trial progress. They were not involved in the design or analysis of the trial. The other authors have no potential conflict of interest to disclose.

**C. funding**

This project has received funding from the Innovative Medicines Initiative 2 Joint Undertaking under grant agreement No 820755. This Joint Undertaking receives support from the European Union's Horizon 2020 research and innovation programme and EFPIA and bioMérieux SA, Janssen Pharmaceutica NV, Accelerate Diagnostics S.L., Abbott, Bio-Rad Laboratories, BD Switzerland Sàrl, and The Wellcome Trust Limited.

**D. data sharing statement**

The article does not contain a report on analysed data.

1 348 **References**

2

3

- 4 349 1. O'Connor R, O'Doherty J, O'Regan A, Dunne C. Antibiotic use for acute respiratory tract infections  
5 350 (ARTI) in primary care; what factors affect prescribing and why is it important? A narrative review. *Ir J Med*  
6 351 *Sci.* 2018;**187**:969-86 doi: 10.1007/s11845-018-1774-5 [published Online First: 2018/03/14].
- 7 352 2. Prat C, Lacoma A. Bacteria in the respiratory tract-how to treat? Or do not treat? *Int J Infect Dis.*  
8 353 2016;**51**:113-22 doi: 10.1016/j.ijid.2016.09.005 [published Online First: 2016/10/26].
- 9 354 3. Langer S, Horn J, Gottschick C, *et al.* Symptom Burden and Factors Associated with Acute  
10 355 Respiratory Infections in the First Two Years of Life-Results from the LoewenKIDS Cohort. *Microorganisms.*  
11 356 2022;**10** doi: 10.3390/microorganisms10010111 [published Online First: 2022/01/22].
- 12 357 4. Cassini A, Högberg LD, Plachouras D, *et al.* Attributable deaths and disability-adjusted life-years  
13 358 caused by infections with antibiotic-resistant bacteria in the EU and the European Economic Area in 2015: a  
14 359 population-level modelling analysis. *Lancet Infect Dis.* 2019;**19**:56-66 doi: 10.1016/s1473-3099(18)30605-4  
15 360 [published Online First: 2018/11/10].
- 16 361 5. Naylor NR, Atun R, Zhu N, *et al.* Estimating the burden of antimicrobial resistance: a systematic  
17 362 literature review. *Antimicrobial resistance and infection control.* 2018;**7**:58 doi: 10.1186/s13756-018-0336-y  
18 363 [published Online First: 2018/05/02].
- 19 364 6. Shrestha P, Cooper BS, Coast J, *et al.* Enumerating the economic cost of antimicrobial resistance per  
20 365 antibiotic consumed to inform the evaluation of interventions affecting their use. *Antimicrobial resistance*  
21 366 *and infection control.* 2018;**7**:98 doi: 10.1186/s13756-018-0384-3 [published Online First: 2018/08/18].
- 22 367 7. Kohns Vasconcelos M, Renk H, Popielska J, *et al.* SARS-CoV-2 testing and infection control strategies  
23 368 in European paediatric emergency departments during the first wave of the pandemic. *Eur J Pediatr.*  
24 369 2020:1-7 doi: 10.1007/s00431-020-03843-w [published Online First: 2020/10/15].
- 25 370 8. Byington CL, Ampofo K, Stockmann C, *et al.* Community Surveillance of Respiratory Viruses Among  
26 371 Families in the Utah Better Identification of Germs-Longitudinal Viral Epidemiology (BIG-LoVE) Study.  
27 372 *Clinical Infectious Diseases.* 2015;**61**:1217-24 doi: 10.1093/cid/civ486 [published Online].
- 28 373 9. Kohns Vasconcelos M, Loens K, Sigfrid L, *et al.* Aetiology of acute respiratory infection in preschool  
29 374 children requiring hospitalisation in Europe-results from the PED-MERMAIDS multicentre case-control  
30 375 study. *BMJ Open Respir Res.* 2021;**8** doi: 10.1136/bmjresp-2021-000887 [published Online First:  
31 376 2021/07/31].
- 32 377 10. PPAS4 Paediatric Group. Antibiotics and uncertainty of diagnosis in viral respiratory infections:  
33 378 point-prevalence survey across 15 European countries. *Acta Paediatr.* 2023; doi: 10.1111/apa.16855  
34 379 [published Online First: 2023/05/25].
- 35 380 11. Kohns Vasconcelos M, Meyer Sauter PM, Santoro R, *et al.* Randomised placebo-controlled  
36 381 multicentre effectiveness trial of adjunct betamethasone therapy in hospitalised children with community-  
37 382 acquired pneumonia: a trial protocol for the KIDS-STEP trial. *BMJ open.* 2020;**10**:e041937 doi:  
38 383 10.1136/bmjopen-2020-041937 [published Online First: 2020/12/31].
- 39 384 12. Hagedoorn NN, Borensztajn DM, Nijman R, *et al.* Variation in antibiotic prescription rates in febrile  
40 385 children presenting to emergency departments across Europe (MOFICHE): A multicentre observational  
41 386 study. *PLoS Med.* 2020;**17**:e1003208 doi: 10.1371/journal.pmed.1003208 [published Online First:  
42 387 2020/08/20].
- 43 388 13. International Conference on Harmonization. E6 Guideline for Good Clinical Practice. 1996.
- 44 389 14. Declaration of Helsinki. Version October 2013.
- 45 390 15. ISO 14155, Clinical investigation of medical devices for human subjects -- Good clinical practice.  
46 391 2011.
- 47 392 16. Doan Q, Enarson P, Kisson N, Klassen TP, Johnson DW. Rapid viral diagnosis for acute febrile  
48 393 respiratory illness in children in the Emergency Department. *Cochrane Database of Systematic Reviews.*  
49 394 2014; doi: 10.1002/14651858.CD006452.pub4 [published Online].
- 50 395 17. Rao S, Lamb MM, Moss A, *et al.* Effect of Rapid Respiratory Virus Testing on Antibiotic Prescribing  
51 396 Among Children Presenting to the Emergency Department With Acute Respiratory Illness: A Randomized  
52 397 Clinical Trial. *JAMA Network Open.* 2021;**4**:e2111836-e doi: 10.1001/jamanetworkopen.2021.11836  
53 398 [published Online].
- 54 399 18. Mattila S, Paalanne N, Honkila M, Pokka T, Tapiainen T. Effect of Point-of-Care Testing for  
55 400 Respiratory Pathogens on Antibiotic Use in Children: A Randomized Clinical Trial. *JAMA Network Open.*  
56 401 2022;**5**:e2216162-e doi: 10.1001/jamanetworkopen.2022.16162 [published Online].

1 402  
2  
3  
4 403 **Acknowledgements**

5  
6  
7 404 We thank all members of the trial committees, all families and children who have taken part, and all  
8  
9 405 participating sites for their invaluable contributions to the trial.

10  
11  
12 406 ADEQUATE (Advanced Diagnostics for Enhanced QUality of Antibiotic prescription in respiratory Tract  
13  
14 407 infections in Emergency rooms) Paediatric Trial Group:

15  
16  
17 408 Clinical Operations: Yasmine Yau, Elia Vitale, Giulio Vecchia, Federica D'Ambrosio, Wietske Bouwman,  
18  
19 409 Marjolein van Esschoten, Frank Leus, David de Pooter, Leen Timbermont, Juan Pablo Rodriguez Ruiz,  
20  
21 410 Benjamin Hommel, Marie Tessonneau, Malte Kohns Vasconcelos

22  
23  
24 411 Microbiology sub-study and biobanking: Leen Timbermont, Juan Pablo Rodriguez Ruiz, Surbhi Malhotra-  
25  
26 412 Kumar

27  
28  
29 413 Health Economics Analysis: Benjamin Hommel, Marie Tessonneau, Florence Allantaz, Sophie Vandepitte,  
30  
31 414 Jean-Louis Tissier, Philippe Cleuziat, Maarten J. Postma, Thea van Asselt, Pim van Dorst, Simon van der Pol,  
32  
33  
34 415 Fernando Antonanzas, Paula Rojas, Marino Gonzales, Dalia Dawoud, Claire Hawksworth

35  
36  
37 416 Data Safety Monitoring Board: Mark Lyttle, Harry Heijerman, Michelle Clements

38  
39  
40 417 Trial Steering Committee: Cristina Prat Aymerich, Florence Allantaz, Philippe Cleuziat, Herman Goossens,  
41  
42 418 Marc Bonten, Julia A. Bielicki

43  
44  
45 419 Coordinating Investigator: Malte Kohns Vasconcelos

46  
47  
48 420 Trial statistician and methodologist: Andrew Atkinson, Henri van Werkhoven

49  
50  
51 421 Chief Investigator: Julia A. Bielicki

52  
53 422 Trial Sites:

54  
55  
56 423 Aristotle University School of Health Sciences, Hippokration General Hospital, Thessaloniki: Maria

57  
58 424 Simitopoulou, Kalliopi Pantartzzi, Kostas Zarras, Argyro Ftergioti, Maria Kitsou, Aristeia Karypiadou, Charis

59  
60



- 1 425 Lampada, Konstantina Charisi, Parthena Savvidou, Olga Tsiatsiou, Elsa Chorafa, Elisavet Michailidou,  
2  
3 426 Emmanuel Roilides, Elias Iosifidis  
4  
5  
6 427 University Hospital Tübingen: Ann-Kathrin Stiegler, Carmen Junk, Kristina Kiesel, Maren Belschner, Maike  
7  
8 428 Seyfried, Kristina Schmauder, Silke Peter, Tobias Walter, Dominic Imort, Fabian Behret, Hanna Renk  
9  
10  
11 429 Universitäts-Kinderspital beider Basel (UKBB): Rahel Berger, Leon Pfeiffer, Emanuela Früh, Elena Robinson,  
12  
13 430 Andrea Marten, Claudia Werner, Malte Kohns Vasconcelos, Julia A. Bielicki  
14  
15  
16 431 Hospital Universitario 12 de Octubre, Madrid: Manuel Gijón, Rosa Calderón, Fátima Machín, Laura  
17  
18 432 Cabello, Andrea Seoane, Sofía Mesa, Lidia Oviedo, Luisa Barón, Irene Hernández, Pablo Rojo  
19  
20  
21 433 University Hospital Lewisham: Emma Gardiner, Lisa Capozzi, Alexander Ross, Anthony Hemeson, Maggie  
22  
23  
24 434 Nyirenda Nyang'wa  
25  
26  
27 435 St. George's Hospital, London: Louisa Brock, Cecilia Hultin, Louise F Hill  
28  
29  
30 436 Ospedale Regionale di Bellinzona e Valli: Alessia Severi Conti, Gianluca Gualco, Federica Vanoni  
31  
32 437  
33  
34  
35  
36  
37  
38  
39  
40  
41  
42  
43  
44  
45  
46  
47  
48  
49  
50  
51  
52  
53  
54  
55  
56  
57  
58  
59  
60

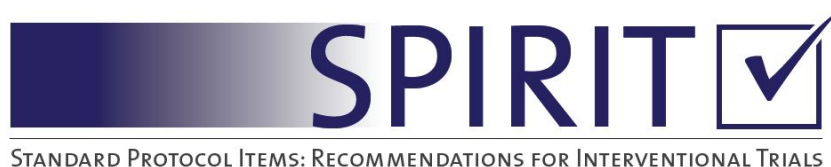

STANDARD PROTOCOL ITEMS: RECOMMENDATIONS FOR INTERVENTIONAL TRIALS

SPIRIT 2013 Checklist: Recommended items to address in a clinical trial protocol and related documents\*

| Section/item                      | Item No | Description                                                                                                                                                                                                                                                                                                                                |
|-----------------------------------|---------|--------------------------------------------------------------------------------------------------------------------------------------------------------------------------------------------------------------------------------------------------------------------------------------------------------------------------------------------|
| <b>Administrative information</b> |         |                                                                                                                                                                                                                                                                                                                                            |
| Title ✓                           | 1       | Descriptive title identifying the study design, population, interventions, and, if applicable, trial acronym                                                                                                                                                                                                                               |
| Trial registration ✓              | 2a      | Trial identifier and registry name. If not yet registered, name of intended registry                                                                                                                                                                                                                                                       |
|                                   | 2b      | All items from the World Health Organization Trial Registration Data Set                                                                                                                                                                                                                                                                   |
| Protocol version I225             | 3       | Date and version identifier                                                                                                                                                                                                                                                                                                                |
| Funding ✓                         | 4       | Sources and types of financial, material, and other support                                                                                                                                                                                                                                                                                |
| Roles and responsibilities        | 5a      | Names, affiliations, and roles of protocol contributors <b>contributor statement and acknowledgements</b>                                                                                                                                                                                                                                  |
|                                   | 5b      | Name and contact information for the trial sponsor named <b>I225-6</b>                                                                                                                                                                                                                                                                     |
|                                   | 5c      | Role of study sponsor and funders, if any, in study design; collection, management, analysis, and interpretation of data; writing of the report; and the decision to submit the report for publication, including whether they will have ultimate authority over any of these activities <b>contributor statement and acknowledgements</b> |
|                                   | 5d      | Composition, roles, and responsibilities of the coordinating centre, steering committee, endpoint adjudication committee, data management team, and other individuals or groups overseeing the trial, if applicable (see Item 21a for data monitoring committee) <b>contributor statement and acknowledgements</b>                         |
| <b>Introduction</b>               |         |                                                                                                                                                                                                                                                                                                                                            |
| Background and rationale          | 6a      | Description of research question and justification for undertaking the trial, including summary of relevant studies (published and unpublished) examining benefits and harms for each intervention <b>I36-61, 65-7, 255-7</b>                                                                                                              |
|                                   | 6b      | Explanation for choice of comparators <b>I56-61</b>                                                                                                                                                                                                                                                                                        |
| Objectives                        | 7       | Specific objectives or hypotheses <b>I69-72</b>                                                                                                                                                                                                                                                                                            |

|    |                                                                     |     |                                                                                                                                                                                                                                                                                                                                                                                                                   |
|----|---------------------------------------------------------------------|-----|-------------------------------------------------------------------------------------------------------------------------------------------------------------------------------------------------------------------------------------------------------------------------------------------------------------------------------------------------------------------------------------------------------------------|
| 1  |                                                                     |     |                                                                                                                                                                                                                                                                                                                                                                                                                   |
| 2  | Trial design                                                        | 8   | Description of trial design including type of trial (eg, parallel group, crossover, factorial, single group), allocation ratio, and framework (eg, superiority, equivalence, noninferiority, exploratory) <b>II69,96,145</b>                                                                                                                                                                                      |
| 3  |                                                                     |     |                                                                                                                                                                                                                                                                                                                                                                                                                   |
| 4  |                                                                     |     |                                                                                                                                                                                                                                                                                                                                                                                                                   |
| 5  |                                                                     |     |                                                                                                                                                                                                                                                                                                                                                                                                                   |
| 6  |                                                                     |     |                                                                                                                                                                                                                                                                                                                                                                                                                   |
| 7  |                                                                     |     |                                                                                                                                                                                                                                                                                                                                                                                                                   |
| 8  | <b>Methods: Participants, interventions, and outcomes</b>           |     |                                                                                                                                                                                                                                                                                                                                                                                                                   |
| 9  |                                                                     |     |                                                                                                                                                                                                                                                                                                                                                                                                                   |
| 10 | Study setting                                                       | 9   | Description of study settings (eg, community clinic, academic hospital) and list of countries where data will be collected. Reference to where list of study sites can be obtained <b>II73-6</b>                                                                                                                                                                                                                  |
| 11 |                                                                     |     |                                                                                                                                                                                                                                                                                                                                                                                                                   |
| 12 |                                                                     |     |                                                                                                                                                                                                                                                                                                                                                                                                                   |
| 13 |                                                                     |     |                                                                                                                                                                                                                                                                                                                                                                                                                   |
| 14 | Eligibility criteria                                                | 10  | Inclusion and exclusion criteria for participants. If applicable, eligibility criteria for study centres and individuals who will perform the interventions (eg, surgeons, psychotherapists) <b>table 1, II84-8</b>                                                                                                                                                                                               |
| 15 |                                                                     |     |                                                                                                                                                                                                                                                                                                                                                                                                                   |
| 16 |                                                                     |     |                                                                                                                                                                                                                                                                                                                                                                                                                   |
| 17 |                                                                     |     |                                                                                                                                                                                                                                                                                                                                                                                                                   |
| 18 |                                                                     |     |                                                                                                                                                                                                                                                                                                                                                                                                                   |
| 19 | Interventions                                                       | 11a | Interventions for each group with sufficient detail to allow replication, including how and when they will be administered <b>II100-12</b>                                                                                                                                                                                                                                                                        |
| 20 |                                                                     |     |                                                                                                                                                                                                                                                                                                                                                                                                                   |
| 21 |                                                                     |     |                                                                                                                                                                                                                                                                                                                                                                                                                   |
| 22 |                                                                     | 11b | Criteria for discontinuing or modifying allocated interventions for a given trial participant (eg, drug dose change in response to harms, participant request, or improving/worsening disease) <b>n/a</b>                                                                                                                                                                                                         |
| 23 |                                                                     |     |                                                                                                                                                                                                                                                                                                                                                                                                                   |
| 24 |                                                                     |     |                                                                                                                                                                                                                                                                                                                                                                                                                   |
| 25 |                                                                     |     |                                                                                                                                                                                                                                                                                                                                                                                                                   |
| 26 |                                                                     | 11c | Strategies to improve adherence to intervention protocols, and any procedures for monitoring adherence (eg, drug tablet return, laboratory tests) <b>n/a</b>                                                                                                                                                                                                                                                      |
| 27 |                                                                     |     |                                                                                                                                                                                                                                                                                                                                                                                                                   |
| 28 |                                                                     |     |                                                                                                                                                                                                                                                                                                                                                                                                                   |
| 29 |                                                                     |     |                                                                                                                                                                                                                                                                                                                                                                                                                   |
| 30 |                                                                     |     |                                                                                                                                                                                                                                                                                                                                                                                                                   |
| 31 |                                                                     | 11d | Relevant concomitant care and interventions that are permitted or prohibited during the trial <b>II96-9</b>                                                                                                                                                                                                                                                                                                       |
| 32 |                                                                     |     |                                                                                                                                                                                                                                                                                                                                                                                                                   |
| 33 |                                                                     |     |                                                                                                                                                                                                                                                                                                                                                                                                                   |
| 34 | Outcomes                                                            | 12  | Primary, secondary, and other outcomes, including the specific measurement variable (eg, systolic blood pressure), analysis metric (eg, change from baseline, final value, time to event), method of aggregation (eg, median, proportion), and time point for each outcome. Explanation of the clinical relevance of chosen efficacy and harm outcomes is strongly recommended <b>respective section (I116ff)</b> |
| 35 |                                                                     |     |                                                                                                                                                                                                                                                                                                                                                                                                                   |
| 36 |                                                                     |     |                                                                                                                                                                                                                                                                                                                                                                                                                   |
| 37 |                                                                     |     |                                                                                                                                                                                                                                                                                                                                                                                                                   |
| 38 |                                                                     |     |                                                                                                                                                                                                                                                                                                                                                                                                                   |
| 39 |                                                                     |     |                                                                                                                                                                                                                                                                                                                                                                                                                   |
| 40 |                                                                     |     |                                                                                                                                                                                                                                                                                                                                                                                                                   |
| 41 |                                                                     |     |                                                                                                                                                                                                                                                                                                                                                                                                                   |
| 42 | Participant timeline                                                | 13  | Time schedule of enrolment, interventions (including any run-ins and washouts), assessments, and visits for participants. A schematic diagram is highly recommended (see Figure) <b>II130-41, we decided against a diagram because the structure of FU is very simple in this trial</b>                                                                                                                           |
| 43 |                                                                     |     |                                                                                                                                                                                                                                                                                                                                                                                                                   |
| 44 |                                                                     |     |                                                                                                                                                                                                                                                                                                                                                                                                                   |
| 45 |                                                                     |     |                                                                                                                                                                                                                                                                                                                                                                                                                   |
| 46 |                                                                     |     |                                                                                                                                                                                                                                                                                                                                                                                                                   |
| 47 |                                                                     |     |                                                                                                                                                                                                                                                                                                                                                                                                                   |
| 48 |                                                                     |     |                                                                                                                                                                                                                                                                                                                                                                                                                   |
| 49 | Sample size                                                         | 14  | Estimated number of participants needed to achieve study objectives and how it was determined, including clinical and statistical assumptions supporting any sample size calculations <b>respective section (I142ff)</b>                                                                                                                                                                                          |
| 50 |                                                                     |     |                                                                                                                                                                                                                                                                                                                                                                                                                   |
| 51 |                                                                     |     |                                                                                                                                                                                                                                                                                                                                                                                                                   |
| 52 |                                                                     |     |                                                                                                                                                                                                                                                                                                                                                                                                                   |
| 53 |                                                                     |     |                                                                                                                                                                                                                                                                                                                                                                                                                   |
| 54 |                                                                     |     |                                                                                                                                                                                                                                                                                                                                                                                                                   |
| 55 | Recruitment                                                         | 15  | Strategies for achieving adequate participant enrolment to reach target sample size <b>n/a</b>                                                                                                                                                                                                                                                                                                                    |
| 56 |                                                                     |     |                                                                                                                                                                                                                                                                                                                                                                                                                   |
| 57 |                                                                     |     |                                                                                                                                                                                                                                                                                                                                                                                                                   |
| 58 | <b>Methods: Assignment of interventions (for controlled trials)</b> |     |                                                                                                                                                                                                                                                                                                                                                                                                                   |
| 59 |                                                                     |     |                                                                                                                                                                                                                                                                                                                                                                                                                   |
| 60 |                                                                     |     |                                                                                                                                                                                                                                                                                                                                                                                                                   |

## Allocation:

- 1  
2  
3  
4 Sequence generation 16a Method of generating the allocation sequence (eg, computer-generated random numbers), and list of any factors for stratification. To reduce predictability of a random sequence, details of any planned restriction (eg, blocking) should be provided in a separate document that is unavailable to those who enrol participants or assign interventions **II108-11**
- 5  
6  
7  
8  
9  
10  
11  
12 Allocation concealment mechanism 16b Mechanism of implementing the allocation sequence (eg, central telephone; sequentially numbered, opaque, sealed envelopes), describing any steps to conceal the sequence until interventions are assigned **II108-11**
- 13  
14  
15  
16  
17  
18 Implementation 16c Who will generate the allocation sequence, who will enrol participants, and who will assign participants to interventions **II108-11**
- 19  
20  
21 Blinding (masking) 17a Who will be blinded after assignment to interventions (eg, trial participants, care providers, outcome assessors, data analysts), and how **II113-4**
- 22  
23  
24  
25  
26 17b If blinded, circumstances under which unblinding is permissible, and procedure for revealing a participant's allocated intervention during the trial **n/a**
- 27  
28  
29

**Methods: Data collection, management, and analysis**

- 30  
31  
32 Data collection methods 18a Plans for assessment and collection of outcome, baseline, and other trial data, including any related processes to promote data quality (eg, duplicate measurements, training of assessors) and a description of study instruments (eg, questionnaires, laboratory tests) along with their reliability and validity, if known. Reference to where data collection forms can be found, if not in the protocol **II130-41**
- 33  
34  
35  
36  
37  
38  
39  
40 18b Plans to promote participant retention and complete follow-up, including list of any outcome data to be collected for participants who discontinue or deviate from intervention protocols **II139-41**
- 41  
42  
43  
44 Data management 19 Plans for data entry, coding, security, and storage, including any related processes to promote data quality (eg, double data entry; range checks for data values). Reference to where details of data management procedures can be found, if not in the protocol **II133-4, 202ff**
- 45  
46  
47  
48  
49  
50  
51 Statistical methods 20a Statistical methods for analysing primary and secondary outcomes. Reference to where other details of the statistical analysis plan can be found, if not in the protocol **respective section (I158ff)**
- 52  
53  
54  
55  
56 20b Methods for any additional analyses (eg, subgroup and adjusted analyses) **referred to SAP**
- 57  
58  
59  
60

1  
2 20c Definition of analysis population relating to protocol non-adherence  
3 (eg, as randomised analysis), and any statistical methods to handle  
4 missing data (eg, multiple imputation) **referred to SAP**  
5

6 **Methods: Monitoring**  
7

8 Data monitoring 21a Composition of data monitoring committee (DMC); summary of its  
9 role and reporting structure; statement of whether it is independent  
10 from the sponsor and competing interests; and reference to where  
11 further details about its charter can be found, if not in the protocol.  
12 Alternatively, an explanation of why a DMC is not needed  
13 **acknowledgements**  
14  
15  
16 21b Description of any interim analyses and stopping guidelines,  
17 including who will have access to these interim results and make the  
18 final decision to terminate the trial **n/a**  
19  
20  
21 Harms 22 Plans for collecting, assessing, reporting, and managing solicited and  
22 spontaneously reported adverse events and other unintended effects  
23 of trial interventions or trial conduct **table 2 and I1216-7**  
24  
25 Auditing 23 Frequency and procedures for auditing trial conduct, if any, and  
26 whether the process will be independent from investigators and the  
27 sponsor **I1218-9**  
28  
29

30 **Ethics and dissemination**  
31

32 Research ethics 24 Plans for seeking research ethics committee/institutional review  
33 approval **respective section (I222ff)**  
34  
35 Protocol 25 Plans for communicating important protocol modifications (eg,  
36 amendments outcomes, analyses) to relevant parties  
37 (eg, investigators, REC/IRBs, trial participants, trial registries,  
38 journals, regulators) **respective section (I222ff)**  
39  
40  
41 Consent or 26a Who will obtain informed consent or assent from potential trial  
42 assent participants or authorised surrogates, and how (see Item 32)  
43 **respective section (I83ff)**  
44  
45 26b Additional consent provisions for collection and use of participant  
46 data and biological specimens in ancillary studies, if applicable **I197-**  
47 **210**  
48  
49  
50 Confidentiality 27 How personal information about potential and enrolled participants  
51 will be collected, shared, and maintained in order to protect  
52 confidentiality before, during, and after the trial **I1133-4, 202ff**  
53  
54 Declaration of 28 Financial and other competing interests for principal investigators for  
55 interests the overall trial and each study site **funding and competing interests**  
56 **statements**  
57  
58  
59  
60

|    |                               |     |                                                                                                                                                                                                                                                                                                                        |
|----|-------------------------------|-----|------------------------------------------------------------------------------------------------------------------------------------------------------------------------------------------------------------------------------------------------------------------------------------------------------------------------|
| 1  |                               |     |                                                                                                                                                                                                                                                                                                                        |
| 2  | Access to data                | 29  | Statement of who will have access to the final trial dataset, and disclosure of contractual agreements that limit such access for investigators <b>data sharing statement</b>                                                                                                                                          |
| 3  |                               |     |                                                                                                                                                                                                                                                                                                                        |
| 4  |                               |     |                                                                                                                                                                                                                                                                                                                        |
| 5  |                               |     |                                                                                                                                                                                                                                                                                                                        |
| 6  | Ancillary and post-trial care | 30  | Provisions, if any, for ancillary and post-trial care, and for compensation to those who suffer harm from trial participation <b>n/a</b>                                                                                                                                                                               |
| 7  |                               |     |                                                                                                                                                                                                                                                                                                                        |
| 8  |                               |     |                                                                                                                                                                                                                                                                                                                        |
| 9  | Dissemination policy          | 31a | Plans for investigators and sponsor to communicate trial results to participants, healthcare professionals, the public, and other relevant groups (eg, via publication, reporting in results databases, or other data sharing arrangements), including any publication restrictions <b>respective section (I239ff)</b> |
| 10 |                               |     |                                                                                                                                                                                                                                                                                                                        |
| 11 |                               |     |                                                                                                                                                                                                                                                                                                                        |
| 12 |                               |     |                                                                                                                                                                                                                                                                                                                        |
| 13 |                               |     |                                                                                                                                                                                                                                                                                                                        |
| 14 |                               |     |                                                                                                                                                                                                                                                                                                                        |
| 15 |                               |     |                                                                                                                                                                                                                                                                                                                        |
| 16 |                               | 31b | Authorship eligibility guidelines and any intended use of professional writers <b>n/a</b>                                                                                                                                                                                                                              |
| 17 |                               |     |                                                                                                                                                                                                                                                                                                                        |
| 18 |                               |     |                                                                                                                                                                                                                                                                                                                        |
| 19 |                               |     |                                                                                                                                                                                                                                                                                                                        |
| 20 |                               | 31c | Plans, if any, for granting public access to the full protocol, participant-level dataset, and statistical code <b>none available yet</b>                                                                                                                                                                              |
| 21 |                               |     |                                                                                                                                                                                                                                                                                                                        |
| 22 |                               |     |                                                                                                                                                                                                                                                                                                                        |
| 23 | <b>Appendices</b>             |     |                                                                                                                                                                                                                                                                                                                        |
| 24 |                               |     |                                                                                                                                                                                                                                                                                                                        |
| 25 | Informed consent materials    | 32  | Model consent form and other related documentation given to participants and authorised surrogates <b>supplement</b>                                                                                                                                                                                                   |
| 26 |                               |     |                                                                                                                                                                                                                                                                                                                        |
| 27 |                               |     |                                                                                                                                                                                                                                                                                                                        |
| 28 | Biological specimens          | 33  | Plans for collection, laboratory evaluation, and storage of biological specimens for genetic or molecular analysis in the current trial and for future use in ancillary studies, if applicable <b>II186ff</b>                                                                                                          |
| 29 |                               |     |                                                                                                                                                                                                                                                                                                                        |
| 30 |                               |     |                                                                                                                                                                                                                                                                                                                        |
| 31 |                               |     |                                                                                                                                                                                                                                                                                                                        |

32 \*It is strongly recommended that this checklist be read in conjunction with the SPIRIT 2013  
 33 Explanation & Elaboration for important clarification on the items. Amendments to the  
 34 protocol should be tracked and dated. The SPIRIT checklist is copyrighted by the SPIRIT  
 35 Group under the Creative Commons "[Attribution-NonCommercial-NoDerivs 3.0 Unported](https://creativecommons.org/licenses/by-nc-nd/3.0/)"  
 36 license.  
 37  
 38  
 39  
 40  
 41  
 42  
 43  
 44  
 45  
 46  
 47  
 48  
 49  
 50  
 51  
 52  
 53  
 54  
 55  
 56  
 57  
 58  
 59  
 60
